# Supplementary material for: Conducting a systematic review and evaluation of commercially available mobile applications (apps) on a health-related topic: the TECH approach and a step-by-step methodological guide
Source: PubMed Central journal article supplement — BMJ Open. 2023 Jun 12;13(6):e073283. doi: 10.1136/bmjopen-2023-073283 (PMC10277147; doi:10.1136/bmjopen-2023-073283), 2023-06-12
Supplement: bmjopen-2023-073283.draft_revisions.pdf [file bmjopen-2023-073283.draft_revisions.pdf]

# BMJ Open

BMJ Open is committed to open peer review. As part of this commitment we make the peer review history of every article we publish publicly available.

When an article is published we post the peer reviewers' comments and the authors' responses online. We also post the versions of the paper that were used during peer review. These are the versions that the peer review comments apply to.

The versions of the paper that follow are the versions that were submitted during the peer review process. They are not the versions of record or the final published versions. They should not be cited or distributed as the published version of this manuscript.

BMJ Open is an open access journal and the full, final, typeset and author-corrected version of record of the manuscript is available on our site with no access controls, subscription charges or pay-per-view fees (<http://bmjopen.bmj.com>).

If you have any questions on BMJ Open's open peer review process please email [info.bmjopen@bmj.com](mailto:info.bmjopen@bmj.com)

# BMJ Open

## Conducting a systematic review and evaluation of commercially available mobile applications (apps) on a health-related topic: the TECH approach and a step-by-step methodological guide

|                                 |                                                                                                                                                                                                                                                                                                                                                                                                                                                                                                                                                                                                                                                                                                                                                                                                                                                                                                                                                                                                                         |
|---------------------------------|-------------------------------------------------------------------------------------------------------------------------------------------------------------------------------------------------------------------------------------------------------------------------------------------------------------------------------------------------------------------------------------------------------------------------------------------------------------------------------------------------------------------------------------------------------------------------------------------------------------------------------------------------------------------------------------------------------------------------------------------------------------------------------------------------------------------------------------------------------------------------------------------------------------------------------------------------------------------------------------------------------------------------|
| Journal:                        | <i>BMJ Open</i>                                                                                                                                                                                                                                                                                                                                                                                                                                                                                                                                                                                                                                                                                                                                                                                                                                                                                                                                                                                                         |
| Manuscript ID                   | bmjopen-2023-073283                                                                                                                                                                                                                                                                                                                                                                                                                                                                                                                                                                                                                                                                                                                                                                                                                                                                                                                                                                                                     |
| Article Type:                   | Communication                                                                                                                                                                                                                                                                                                                                                                                                                                                                                                                                                                                                                                                                                                                                                                                                                                                                                                                                                                                                           |
| Date Submitted by the Author:   | 01-Mar-2023                                                                                                                                                                                                                                                                                                                                                                                                                                                                                                                                                                                                                                                                                                                                                                                                                                                                                                                                                                                                             |
| Complete List of Authors:       | Gasteiger, Norina; The University of Manchester, Division of Nursing, Midwifery & Social Work; Division of Informatics, Imaging & Data Sciences<br>Dowding, Dawn; University of Manchester, Division of Nursing, Midwifery & Social Work<br>Norman, Gill; The University of Manchester, Division of Nursing, Midwifery & Social Work<br>McGarrigle, Lisa; The University of Manchester, Division of Nursing, Midwifery and Social Work; Manchester Academic Health Science Centre<br>East-Telling, Charlotte; The University of Manchester, Division of Nursing, Midwifery and Social Work<br>Jones, Debra; The University of Manchester, Division of Nursing, Midwifery and Social Work<br>Vercell, Amy; The University of Manchester, Division of Nursing, Midwifery and Social Work; The Christie NHS Foundation Trust<br>Ali, Syed; The University of Manchester, Division of Informatics, Imaging & Data Sciences<br>O'Connor, Siobhan; The University of Manchester, School of Nursing, Midwifery and Social Work |
| <b>Primary Subject Heading</b>: |                                                                                                                                                                                                                                                                                                                                                                                                                                                                                                                                                                                                                                                                                                                                                                                                                                                                                                                                                                                                                         |
| Secondary Subject Heading:      |                                                                                                                                                                                                                                                                                                                                                                                                                                                                                                                                                                                                                                                                                                                                                                                                                                                                                                                                                                                                                         |
| Keywords:                       | Telemedicine < BIOTECHNOLOGY & BIOINFORMATICS, Systematic Review, Health informatics < BIOTECHNOLOGY & BIOINFORMATICS, Information technology < BIOTECHNOLOGY & BIOINFORMATICS, STATISTICS & RESEARCH METHODS                                                                                                                                                                                                                                                                                                                                                                                                                                                                                                                                                                                                                                                                                                                                                                                                           |
|                                 |                                                                                                                                                                                                                                                                                                                                                                                                                                                                                                                                                                                                                                                                                                                                                                                                                                                                                                                                                                                                                         |

SCHOLARONE™  
Manuscripts

1  
2  
3 1 **Conducting a systematic review and evaluation of commercially available mobile**  
4 2 **applications (apps) on a health-related topic: the TECH approach and a step-by-**  
5 3 **step methodological guide**  
6  
7 4

8  
9 5 **Authors**

10  
11 6 Norina Gasteiger, MPH, PhD fellow<sup>1,2</sup>

12 7  
13 8 Dawn Dowding, PhD, Professor in Clinical Decision-Making<sup>1</sup>

14 9  
15 10 Gill Norman, PhD, Research Fellow<sup>1</sup>

16 11  
17 12 Lisa McGarrigle, PhD, Research Fellow<sup>1,3</sup>

18 13  
19 14 Charlotte Eost-Telling, PhD, Research Fellow<sup>1</sup>

20 15  
21 16 Debra Jones, MSc, Research Associate<sup>1</sup>

22 17  
23 18 Amy Vercell, MSc, Research Associate<sup>1,4</sup>

24 19  
25 20 Syed Mustafa Ali, MPH, Research Associate<sup>2</sup>

26 21  
27 22 Siobhan O'Connor, PhD, Senior Lecturer<sup>1</sup>

28 23  
29 24  
30 25 1. Division of Nursing, Midwifery and Social Work, School of Health Sciences, The University of  
31 Manchester, Manchester, United Kingdom

32 26  
33 27 2. Division of Informatics, Imaging & Data Sciences, School of Health Sciences, The University of  
34 Manchester, Manchester, United Kingdom

35 28  
36 29 3. Manchester Academic Health Science Centre, Manchester, M13 9NQ, United Kingdom

37 30  
38 31 4. The Christie NHS Foundation Trust, Wilmslow Road, Manchester, M20 4BX

39 32  
40 33 **Corresponding author:** Norina Gasteiger, [norina.gasteiger@manchester.ac.uk](mailto:norina.gasteiger@manchester.ac.uk)

41 34  
42 35 **ORCiDs:**

43 36 NG: 0000-0001-7801-7417

44 37 DD: 0000-0001-5672-8605

45 38 GN: 0000-0002-3972-5733

46 39 LM: 0000-0002-0533-3029

47 40 CE-T: 0000-0002-9568-3195

48 41 DJ: 0000-0003-1479-3622

49 42 AV: 0000-0002-4121-6524

50 43 SMA: 0000-0001-9393-9049

51 44 SO: 0000-0001-8579-1718

52 45  
53 46  
54 47 **Word count:** 5503

## 1 ABSTRACT

2  
3  
4  
5  
6  
7  
8  
9  
10  
11  
12  
13  
14  
15  
16  
17  
18  
19  
20  
21  
22  
23  
24  
25  
26  
27  
28  
29  
30  
31  
32  
33  
34  
35  
36  
37  
38  
39  
40  
41  
42  
43  
44  
45  
46  
47  
48  
49  
50  
51  
52  
53  
54  
55  
56  
57  
58  
59  
60

**Objectives:** To provide an overview of the methodological considerations for conducting commercial smartphone health app reviews (mHealth reviews), with the aim of systematising the process and supporting high-quality evaluations of mHealth apps.

**Design:** Synthesis of our research team's experiences of conducting and publishing various reviews of mHealth apps and hand-searching the top medical informatics journals (e.g., The Lancet Digital Health, npj Digital Medicine, Journal of Biomedical Informatics, and the Journal of the American Medical Informatics Association) over the last five years (2018-2022) to identify other app reviews to contribute to the discussion of this method and supporting framework for developing a research (review) question and determining the eligibility criteria.

**Results:** We present seven steps to support rigour in conducting app reviews in health: 1) writing a research question, 2) conducting scoping searches and developing the protocol, 3) determining the eligibility criteria using the TECH framework, 4) conducting the final search and screening of health apps, 5) data extraction, 6) quality, functionality, and other assessments and 7) analysis and synthesis of findings. We introduce the novel TECH approach to developing review questions and the eligibility criteria, which considers the Target user, Evaluation focus, Connectedness, and the Health domain. Patient and public involvement and engagement opportunities are acknowledged, including co-developing the protocol and undertaking quality or usability assessments.

**Conclusion:** Commercial mHealth app reviews can provide important insights into the health app market, including the availability of apps and their quality and functionality. We have outlined seven key steps for conducting rigorous health app reviews in addition to the TECH acronym, which can support researchers in writing research questions and determining the eligibility criteria. Future work will include a collaborative effort to develop reporting guidelines and a quality appraisal tool to ensure transparency and quality in systematic app reviews.

**KEYWORDS:** Mobile applications; Smartphone; Telemedicine; mHealth; Systematic review; Method

## STRENGTHS AND LIMITATIONS

- We leveraged the expertise of an experienced research team who have conducted various health app and systematic reviews to provide interim recommendations for good practice, based on seven key steps, to support standardised health app review methods and develop approaches to best practice in the mHealth field.
- Relevant literature from key medical informatics journals was screened to present a robust analysis and comparison between systematic reviews and app reviews in health.
- We propose TECH, a novel framework for constructing review questions and refining eligibility criteria in health app reviews.
- This work focuses on mobile apps and does not include the emerging fields of virtual reality, augmented reality, or mixed-reality apps.
- The methods presented are informed by existing app reviews, which have primarily focused on client-facing apps (e.g., for patients, the public, or healthcare providers) rather than for the health system or data services, which are also key target users.

## 1 INTRODUCTION

2 With the rise in the use of smartphones and other mobile technologies, there has been an increase in the  
3 availability of health applications (mHealth apps) designed to be used by individuals for various health  
4 issues. Health apps can also support health and care professionals in their daily clinical practice by  
5 providing decision support, access to clinical guidelines, and education and training[1]. In 2018, over  
6 325,000 health apps were developed[2], covering many health conditions and targeted behaviours. For  
7 example, mHealth apps can help to support self-management of conditions like diabetes[3], facilitate  
8 remote monitoring of patients with chronic conditions[4], or support patients with general behaviour  
9 change such as increasing/monitoring physical activity[5] or dietary change[6]. Some health apps also  
10 support public health initiatives, such as promoting healthy lifestyles and encouraging the uptake of  
11 screening and vaccination programmes[7, 8]. The World Health Organization (WHO) have released  
12 mHealth apps to educate people about road safety, sun protection measures, and COVID-19[9]. However,  
13 concerns have been raised about the quality of advice and support such health apps provide[10]. Bates et  
14 al. also highlight concerns with the accuracy of apps designed to support medical diagnosis and potential  
15 gaps in the quality of apps regarding safety and privacy[2].

16  
17 There have been attempts to provide frameworks for evaluating the quality of mHealth apps. A systematic  
18 review identified 45 frameworks for evaluating mHealth apps, which varied according to the target users  
19 (e.g., developers, patients), specific conditions (e.g., diabetes, mental health, cancer, pain) and various  
20 elements of evaluation that are identified in the core domains for Health Technology Assessment  
21 framework (such as safety and effectiveness)[11]. Other frameworks have promoted a more holistic  
22 approach by encompassing privacy and security, the evidence base, ease of use, and data integration[12]  
23 or ethical principles related to using health apps in health psychology[13]. Reviews have also identified  
24 existing methods for assessing mHealth app quality[14], as well as guidelines for reporting evaluations of  
25 specific types of technology, such as sensors[15] and mHealth interventions, more broadly[16]. This  
26 includes the development of a CONSORT-EHEALTH checklist, an extension of the original CONSORT  
27 checklist for reporting randomised controlled trials (RCTs)[17]. This focuses on improving the reporting  
28 of evidence from research into the use and effectiveness of mHealth applications in research studies.

29  
30 The existing initiatives reflect a focus on the quality of research activity, whereby mHealth interventions  
31 are evaluated in research studies, and the results of those studies are reported[18]. The process of  
32 systematically reviewing published studies then provides an overview of the evidence base for the use and  
33 effectiveness of different types of mHealth interventions for different patient populations and various  
34 purposes. However, guidance is missing on how to systematically review commercially developed  
35 mHealth apps (i.e., the software products available to download from app stores), which are often not  
36 derived from research or subject to evaluation in research studies.

37  
38 The process of searching, screening, extracting and analysing data, and critically appraising mHealth apps  
39 available via commercial platforms can differ from traditional approaches to reviewing published research  
40 studies of health apps. A key difference between a systematic literature review and a systematic health  
41 app review is the items evaluated. In a systematic review, reviewers attempt to identify evidence from  
42 research studies from peer-reviewed journals or grey literature to evaluate the effectiveness (RCT  
43 evidence) or other characteristics that influence the effectiveness, uptake, and engagement with digital

1 health interventions. As we have outlined, several existing systematic reviews of mHealth applications do  
 2 this. In a systematic health app review, we focus on providing a transparent and replicable evaluation of  
 3 the functionality, quality and purpose of mHealth apps for particular user groups or health conditions. A  
 4 systematic health app review is informed by the principles and process of more traditional systematic  
 5 reviews, in terms of approaches to searching, use of inclusion/exclusion criteria, and explicit assessment  
 6 measures of quality. However, how these are operationalised is methodologically different and is the  
 7 focus of this paper. By building on our research team's experiences of conducting and publishing various  
 8 reviews of commercially available mHealth apps, we provide an overview of the methodological  
 9 considerations, aiming to systematise the process and support high-quality reviews of mHealth apps. In  
 10 doing so, we outline the 7-step process for conducting systematic health app reviews.

## 11 METHODS

12 In this paper, we use examples from our previous work as case studies, to highlight and discuss the  
 13 methodological issues raised when conducting a review of commercially available health apps (see Table  
 14 1). Two of our reviews informed wider research studies; a review of apps used to support hand hygiene to  
 15 provide the focus for a subsequent research evaluation[19], and a review of patient-facing genetics apps to  
 16 inform the design and development of a genetic counselling app[20]. Our other app reviews have  
 17 provided evidence alongside a more traditional systematic review of the published research literature or as  
 18 an independent review to guide clinicians/patients about mHealth apps they could use to support patient  
 19 care.

20 We also hand-searched the top medical informatics journals (i.e., The Lancet Digital Health, npj Digital  
 21 Medicine, Journal of Biomedical Informatics, and the Journal of the American Medical Informatics  
 22 Association) over the last five years (2018-2022) to identify other reviews of commercial health apps to  
 23 contribute to the discussion of this methodological approach.

24 **Table 1.** Summary of our app reviews, which are used as cases to inform the methods for conducting  
 25 systematic app reviews.

| 26 First author(s);<br>date published | 27 Aim                                                                                                                                                                                                           | 28 Purpose of review      | 29 Number<br>of apps<br>reviewed |
|---------------------------------------|------------------------------------------------------------------------------------------------------------------------------------------------------------------------------------------------------------------|---------------------------|----------------------------------|
| 30 Paripoorani; in-<br>progress[21]   | 31 To explore and identify menopause apps<br>available in the UK, assess their quality,<br>functions, and content, and determine<br>whether and to what extent they focus on<br>menopause-related osteoporosis.  | 32 Standalone app review. | 33 28                            |
| 34 Vercell et al.,<br>2022[22]        | 35 To identify patient-facing cancer apps<br>which can record patient reported outcomes,<br>and to explore their purpose, functionality,<br>quality, and ability to integrate with<br>electronic health records. | 36 Standalone app review. | 37 12                            |

|                                      |                                                                                                                                                                                                                                    |                                                                                        |    |
|--------------------------------------|------------------------------------------------------------------------------------------------------------------------------------------------------------------------------------------------------------------------------------|----------------------------------------------------------------------------------------|----|
| Gasteiger & Vercell et al., 2022[20] | To identify patient-facing smartphone apps related to genetic or genomic conditions available in the UK and explore their purpose, functions, and quality.                                                                         | Inform the design of a genetics app which is being co-designed with community members. | 22 |
| Gasteiger et al., 2021[19]           | To identify smartphone apps that support hand hygiene practice and to assess their content, technical and functional features, and quality. A secondary objective was to make design and research recommendations for future apps. | Background of wider project on extended reality hand hygiene training.                 | 90 |
| Ali et al., 2021[23]                 | To explore the current state of smartphone-based pain manikins and to formulate recommendations to guide their development in the future.                                                                                          | To formulate recommendations to guide the development of pain manikins in the future.  | 28 |
| Pearsons et al., 2021[24]            | To identify commercially available atrial fibrillation self-management apps, analyse, and synthesise their characteristics, functions, privacy/security, behaviour change techniques, quality and usability.                       | To inform the development and testing of a new app for atrial fibrillation.            | 5  |
| McGarrigle et al., 2020[25]          | To identify existing apps and websites to support independent engagement in strength and balance exercises by older people, and to evaluate evidence for effectiveness, quality, and use of behaviour change techniques.           | To provide evidence-based alternatives to face-to-face exercise classes.               | 13 |

### Step 1. Writing a research question

The focus of an app review will influence the development of the research questions and underpinning approach to evaluating health apps. If the purpose is to produce a standalone review to support future research and innovation in a specific health domain, understanding existing gaps can help formulate a more general research question. However, if the review is the starting point of a programme of research that aims to design, develop, and evaluate a new health app with a population of patients, carers, health professionals, or the public then the research questions may be more focused to examine aspects of apps such as their quality, functionality or availability. Formulating an answerable review question is essential for systematic literature reviews. While formulating a review question helps guide all stages of a systematic literature review (e.g., searching, screening, extracting, and synthesising), not every question format applies to systematic app reviews. For example, the PICO format is appropriate for systematic literature reviews looking at the effectiveness and evaluation of interventions in a target population. However, in systematic health app reviews, reviewers can only access the results of effectiveness or evaluation studies (if conducted) if they are published. A bespoke alternative is required, just as with systematic qualitative reviews where SPIDER is used. Therefore, we propose the acronym 'TECH,'



1  
2  
3 1 which represents; 1) Target user, 2) Evaluation focus, 3) Connectedness, and 4) Health domain, as a  
4 2 mechanism to develop a focused research question to guide a health app review (see Figure 1). TECH is  
5 3 designed to capture the nuances of this health domain, supporting the development of clear, answerable  
6 4 research questions. It is important to note that connectedness refers to connecting with other devices or  
7 5 applications and existing human-drive digital or other services—such as a health app for booking  
8 6 appointments with therapists.  
9  
10 7

## 11 8 **Step 2. Conducting scoping searches and developing the protocol**

12 9

13  
14 10 A preliminary (scoping) search of the health app market via the Apple, Google, and Microsoft app stores  
15 11 is an essential first step to help determine whether the number of commercial health apps available is  
16 12 feasible to review. It is worth noting that the language used in descriptions of commercial mHealth apps  
17 13 can vary widely and differ from the scientific language used in published research studies. Hence, a broad  
18 14 search using a range of terminology should be employed initially to avoid missing relevant health apps. If  
19 15 too few health apps are returned, this might allow for broadening the scope of the topic, while too many  
20 16 apps will likely require the scope and language used to be narrowed. This means that the research  
21 17 question and the eligibility criteria may need to be refined iteratively, with multiple scoping searches  
22 18 performed until a reasonable number of apps are identified.  
23  
24 19

25  
26 20 In our previous work, we identified 236[21], 405[22], 555[24], 668[19], 754[20] and 3938[23] health  
27 21 apps from initial searches, before screening or deduplication took place. One of our reviews identified  
28 22 7561 apps before screening[25] due to the topic (exercise), for which many apps exist. Following the  
29 23 initial screening of app titles and app store descriptions, this number was significantly reduced, and only  
30 24 13 were included in the review. However, each research team should decide what number is appropriate  
31 25 by considering resources (e.g., time, budget, and the number of reviewers available) and the topic of  
32 26 interest.  
33  
34 27

35  
36 28 Scoping searches can also help to identify important considerations for refining the inclusion and  
37 29 exclusion criteria. For example, in our review of hand hygiene apps[19], we initially intended to target  
38 30 healthcare providers as the population of interest. However, the scoping search highlighted that few apps  
39 31 specified their intended users. We, therefore, removed healthcare providers as the intended audience from  
40 32 the inclusion criteria and replaced this with adults more generally. It is important to note that the scoping  
41 33 search should be conducted when the team is almost ready to begin the final searches, as health apps can  
42 34 disappear and emerge quickly from app stores. This means that the numbers determined from the scoping  
43 35 searches will likely differ from the number of apps identified in the final search. Longer periods between  
44 36 the scoping and final search will result in more substantial differences in the number of apps available.  
45  
46 37

47  
48 38 In addition to scoping searches in the app stores, we recommend conducting initial searches in databases  
49 39 (e.g., MEDLINE and SCOPUS) and protocol registration databases to identify whether similar app  
50 40 reviews have been published or are underway. We also strongly recommend that researchers  
51 41 prospectively develop a protocol to guide their methods. Unlike systematic reviews which should usually  
52 42 be registered on PROSPERO (<https://www.crd.york.ac.uk/prospéro/>) or OSF (<https://osf.io/>), there have  
53 43 not been any formal requirements to publish protocols of systematic health app reviews. However, we  
54 44 recommend that future protocols for commercial health app checks be published (in advance of the  
55  
56  
57  
58  
59  
60



1  
2  
3 1 searches) on OSF to reduce the likelihood that the review is unnecessarily duplicated and ensure greater  
4 2 research transparency. This is becoming accepted practice for other reviews (e.g., scoping reviews) for  
5 3 which PROSPERO registration is currently not possible[26].  
6 4

### 8 5 **Step 3. Determining the eligibility criteria using the TECH framework**

9 6

10 7 Inclusion and exclusion criteria should be carefully defined using the information obtained in the scoping  
11 8 searches. Frameworks such as PICO or SPIDER may help develop eligibility criteria for a review so that  
12 9 characteristics such as the population/sample, type of intervention or phenomenon of interest, and  
13 10 outcomes related to mHealth apps are considered[27]. However, we propose using a more focused  
14 11 framework for health app reviews to support the nuances of undertaking this type of systematic review, as  
15 12 the aim is not to examine the effectiveness of apps or to synthesise the findings of qualitative studies on  
16 13 health apps. As described above, the ‘TECH’ acronym considers the Target user, Evaluation focus,  
17 14 Connectedness, and Health domain (see Figure 1). Well-thought-out eligibility criteria using the TECH  
18 15 framework may support the development of an appropriate search strategy considering four aspects of  
19 16 commercial health apps, which can lead to a systematic and unbiased selection of appropriate apps.  
20 17 Additionally, reviewers should consider searching the literature to identify published and relevant app  
21 18 reviews to refine the eligibility criteria further.  
22 19

23 20 A health app may be characterised by its intended use and target audience. Therefore, we suggest  
24 21 separating the eligibility criteria into two components: app characteristics (evaluation focus,  
25 22 connectedness, health domain) and target audience characteristics (e.g., age, gender, race/ethnicity,  
26 23 geographic location). App characteristics are likely to include the type of health intervention or health  
27 24 prevention method, such as self-management, that can be captured under the ‘Evaluation focus’, along  
28 25 with the target disease, problem or focus of the health app, which falls under the ‘Health domain’. It may  
29 26 be helpful to state whether the health condition is specific or if it covers a broad category of health-related  
30 27 issues. Some health apps can link to other software applications, connect to hardware devices (e.g.,  
31 28 wearable technologies), or rely on additional external devices (e.g., virtual reality headsets or  
32 29 smartwatches) to function correctly, which should be captured under the ‘Connectedness’ criteria. The  
33 30 target audience characteristics will likely include the population type, including patients, healthcare  
34 31 professionals, healthcare students, carers, the public, or particular organisations. Audience characteristics  
35 32 may also include age ranges or if the app is aimed at children or adults; whether the app is aimed at  
36 33 individuals or groups; whether it is assumed that users will pay to access the app (or content within it) and  
37 34 whether the app is available in certain languages or locations.  
38 35

### 36 36 **Step 4. Conducting the final search and screening of health apps**

37 37

38 38 Once the scoping searches are complete and the search terms have been collated, the final search can be  
39 39 run on the main app stores (i.e., Apple, Google Play, and Microsoft) to identify potentially relevant health  
40 40 apps. Several third-party app stores or repositories are also available for Android-based apps (e.g.,  
41 41 Amazon Appstore, F-Droid, and Samsung Galaxy Apps), some of which are open source making the  
42 42 download process easier. The volume of app stores that can be searched will depend on the time and  
43 43 resources available to the review team. Other approaches include using a proprietary software database  
44 44 which enables searching for mobile health apps across iOS and Google Play app stores[28] or publicly  
45 46  
46 47  
47 48  
48 49  
49 50  
50 51  
51 52  
52 53  
53 54  
54 55  
55 56  
56 57  
57 58  
58 59  
59 60

1 available online rating frameworks for health apps that use expert reviewers[29] such as the Organization  
2 for the Review and Care of Health Apps (ORCHA, <https://orchahealth.com/>), the PsyberGuide by One  
3 Mind (<https://onemindpsyberguide.org/>), and MindTools. This approach could be combined with  
4 independent searching and evaluating of commercial mHealth apps to ensure an exhaustive assessment is  
5 conducted.

6  
7 In contrast to established bibliographical research databases such as MEDLINE or PubMed, which enable  
8 complex searches (e.g., use of Boolean operators and filtering options), the search function within app  
9 stores is limited. For example, basic filters may exclude apps that cost or only include child-friendly apps.  
10 Other factors app stores use may also affect search results (e.g., app rating or use of adverts). To  
11 overcome this, searching across multiple app stores is advisable.

12  
13 The search on an app store results in a list of available apps and their descriptions. Unlike research  
14 literature databases, there are no options to export the results in a useful format (e.g., RIS) for uploading  
15 to specialised screening and data management software (e.g., Covidence or EndNote). Hence, the research  
16 team must review each app on the results page of each app store to determine if it meets the inclusion  
17 criteria for the review. Like systematic literature reviews, using two or more researchers to reach a  
18 consensus on eligibility from the review enhances rigour and study quality. Screening should ideally be  
19 conducted on the same day to avoid differences in search results on the different app stores, which can  
20 vary day-to-day and across countries. A workaround can be to log the app name, version number and link  
21 to the webpage on the app store hosting each app to capture the search results and ensure these are used  
22 consistently by the review team.

23  
24 The second screening stage involves downloading all apps deemed to have met the inclusion criteria,  
25 requiring at least one Android and one iPhone smartphone between the review team. Strategies for this  
26 can include having separate researchers download apps using different devices or sharing one device  
27 between reviewers. Some health apps also require user accounts to be set up and verified before allowing  
28 access to their full functionality, which may be required to assess eligibility. In one of our reviews, we  
29 approached app developers for full access for the review, finding that they were more than happy to allow  
30 this[25]. Additional researchers can be consulted to resolve differences during the second screening  
31 phase. Finally, modifying a PRISMA flow diagram[30] can provide a transparent overview of the search  
32 and screening process.

### 33 34 **Step 5. Data extraction**

35  
36 Like systematic literature reviews, the data extraction process in app reviews requires identifying relevant  
37 information from the eligible apps. Data is extracted into a predefined data extraction (coding) sheet.  
38 Henson et al.[12] developed a five-level framework for evaluating health apps, concluding that  
39 background information, privacy and security, evidence, ease of use and data integration are vital  
40 components to consider. Across our previous work, we have categorised the items as descriptive  
41 information, technical information, and content (see Table 2). We have included additional items  
42 regarding gamification principles and tactics used in an app review by Rajani et al.[31] and levels of  
43 personalisation, security and privacy, which Parmar et al.[28] proposed. Other approaches used in one of  
44 our reviews[24] includes extracting information on the Online Trust Alliance Best Practices Privacy

1 Recommendations[32]. This considers four elements: 1) basic notice/disclosure, 2) key compliance  
 2 policies, 3) protected privacy and protected sharing criteria, and 4) miscellaneous privacy elements.  
 3 Lastly, our osteoporosis app review considered ratings by the Organisation for the Review of Care and  
 4 Health Apps (ORCHA) (<https://orchahealth.com/>). ORCHA objectively reviews health apps, giving  
 5 scores for three domains (data privacy, professional assurance, and usability/accessibility) and an overall  
 6 score (%). Scores below 65% imply the presence of some issues, and below 45% indicates considerable  
 7 issues.

10 **Table 2.** Example of data extraction items for a commercial health app review.  
 11

| Items                                                                                  | Description                                                                                                                                                     |
|----------------------------------------------------------------------------------------|-----------------------------------------------------------------------------------------------------------------------------------------------------------------|
| Descriptive information                                                                |                                                                                                                                                                 |
| App name                                                                               | Name of the mobile app                                                                                                                                          |
| Version number                                                                         | Version of the app reviewed                                                                                                                                     |
| Developer                                                                              | Name of the developer                                                                                                                                           |
| Market/s available                                                                     | Name of the markets where the app is available                                                                                                                  |
| Cost                                                                                   | Select which apply: free to download, cost to download (in GBP); in-app purchases available                                                                     |
| Affiliated with a professional medical/health association, charity, or government body | No; Yes (name of organisation)                                                                                                                                  |
| Average user rating from the app market                                                | Not rated; Average number of public ratings (maximum 5 points)                                                                                                  |
| Number of user ratings from the app markets                                            | Total number of user ratings                                                                                                                                    |
| Technical information                                                                  |                                                                                                                                                                 |
| Privacy strategy                                                                       | Select which apply: Privacy policy, login, password, two-factor authentication, compliance with data protection acts (e.g., HIPAA or GDPR), no privacy strategy |
| Security                                                                               | Select which apply: email verification, text verification, social media verification, no security strategy                                                      |
| Third-party authorizations (e.g., data sharing)                                        | Yes; No                                                                                                                                                         |
| Works offline                                                                          | Yes; No                                                                                                                                                         |

|                                                            |                                                                                                                                                                                                                                                                                                                                                                                                                                                                                                                                                                                                                                      |
|------------------------------------------------------------|--------------------------------------------------------------------------------------------------------------------------------------------------------------------------------------------------------------------------------------------------------------------------------------------------------------------------------------------------------------------------------------------------------------------------------------------------------------------------------------------------------------------------------------------------------------------------------------------------------------------------------------|
| Works in the background                                    | Yes; No                                                                                                                                                                                                                                                                                                                                                                                                                                                                                                                                                                                                                              |
| Asks to enable push notifications                          | Yes; No                                                                                                                                                                                                                                                                                                                                                                                                                                                                                                                                                                                                                              |
| Content                                                    |                                                                                                                                                                                                                                                                                                                                                                                                                                                                                                                                                                                                                                      |
| Purpose                                                    | <ul style="list-style-type: none"> <li>• Diagnose, record data/track, educate/inform, instruct, remind, analyse (i.e., DNA sample/test data)<sup>A</sup></li> <li>• Remind, track, record data, educate/instruct, inform, convince, provide feedback<sup>B</sup></li> <li>• Educational; risk assessor; tracking<sup>C</sup></li> <li>• Diagnose, record data/track, educate/inform, instruct, remind, analyse<sup>D</sup></li> <li>• Educate, instruct<sup>E</sup></li> </ul>                                                                                                                                                       |
| Description                                                | Summary of the app's content                                                                                                                                                                                                                                                                                                                                                                                                                                                                                                                                                                                                         |
| **Behaviour change techniques used <sup>B</sup>            | <ul style="list-style-type: none"> <li>• Select which apply: self-monitoring, feedback, goal-setting and action-planning, social support, reward/threat, prompt practice</li> <li>• Make a note of applicable BCTs using Michie's 93 item BCT taxonomy as a guide[33]<sup>E</sup></li> </ul>                                                                                                                                                                                                                                                                                                                                         |
| Best practice guidelines mentioned <sup>B</sup>            | No; Yes (name, e.g., WHO 5 moments for hand hygiene)                                                                                                                                                                                                                                                                                                                                                                                                                                                                                                                                                                                 |
| Scientific studies mentioned <sup>E</sup>                  | No; Yes (which, what claims are made)                                                                                                                                                                                                                                                                                                                                                                                                                                                                                                                                                                                                |
| Comprehensiveness of the content <sup>B</sup>              | Select which criteria were met (from predetermined criteria)                                                                                                                                                                                                                                                                                                                                                                                                                                                                                                                                                                         |
| Innovative / personalisation features used <sup>B, E</sup> | <ul style="list-style-type: none"> <li>• Select which apply: personal profile, tracking/reminders, virtual reality, augmented reality*, app-based community, gamification, chatbots (avatars/characters, competition, levels, scores, marketplace/coins, rules, collaboration/teamwork).</li> <li>• Summary of the features</li> </ul>                                                                                                                                                                                                                                                                                               |
| Gamification techniques                                    | <ul style="list-style-type: none"> <li>• Principles used (select which apply): goal-setting, capacity to overcome challenges (e.g., growth or learning), feedback on performance, reinforcement, compare progress (e.g., monitoring), social connectivity, fun and playfulness (e.g., alternative reality), no gamification principles used</li> <li>• Tactics used (select which apply): providing clear goals, offering a challenge, levels or incremental challenges, allocating points, showing progress, providing feedback, rewards, badges for achievements, showing game leaders (e.g., leaderboard), story/theme</li> </ul> |

|                                                                       |                                                                                                                                                                                                                                                                                                                                                                                                                                                                                                                                                                                                                         |
|-----------------------------------------------------------------------|-------------------------------------------------------------------------------------------------------------------------------------------------------------------------------------------------------------------------------------------------------------------------------------------------------------------------------------------------------------------------------------------------------------------------------------------------------------------------------------------------------------------------------------------------------------------------------------------------------------------------|
| Levels of personalisation                                             | <ul style="list-style-type: none"> <li>• Select which apply: implicit personalisation (information needed for personalisation was obtained by the system), explicit personalisation (information required active use/engagement), no personalisation</li> <li>• Type of personalisation (select which apply): individuated (targets an individual user), categorical (targets groups)</li> <li>• Aspects of personalisation (select which apply): content, user interface (the manner in which information is presented), delivery channel (the media through which information is delivered), functionality</li> </ul> |
| Data can be integrated into the electronic health record <sup>D</sup> | No; Yes                                                                                                                                                                                                                                                                                                                                                                                                                                                                                                                                                                                                                 |
| Flesch Reading Ease                                                   | Scored 0 to 100                                                                                                                                                                                                                                                                                                                                                                                                                                                                                                                                                                                                         |
| Flesch-Kincaid Grade Level                                            | Score corresponds with the USA education grade level                                                                                                                                                                                                                                                                                                                                                                                                                                                                                                                                                                    |
| ORCHA ratings <sup>C</sup>                                            | <ul style="list-style-type: none"> <li>• Reviewed by ORCHA: yes; no</li> <li>• If rated, scores for 3 domains (%): Data privacy, professional assurance and usability/accessibility</li> <li>• If rated, overall score: %</li> </ul>                                                                                                                                                                                                                                                                                                                                                                                    |

**Notes:**

<sup>A</sup> Item used for the genetic app review

<sup>B</sup> Item used for hand hygiene app review

<sup>C</sup> Item used for the osteoporosis app review

<sup>D</sup> Item used for the oncology app review

<sup>E</sup> Item used for strength and balance exercises for older adults app review

\* Some apps require additional devices such as headsets and may not be appropriate to be included in a general app review

We encourage researchers to develop their own data extraction items as relevant to their topics of interest. For example, in our hand hygiene app review and like other app reviews[34, 35], we developed criteria to assess the comprehensiveness of the content by identifying themes across reputable sources and guidelines on hand hygiene. Other examples include extracting information about health app security and privacy, including HIPPA or COPPA compliance, whether a medical disclaimer was provided, encrypted data disclaimer, and user verification strategies during login[28].

Readability metrics can also help determine how appropriate the language used in each app is. Researchers can determine readability by copying a paragraph into a Microsoft Word document and using two Flesch-Kincaid metrics that are built into the word processing software[36, 37]. The Flesch-Kincaid Reading Ease score ranges from 0 to 100, with higher scores indicating that the material is easier to read[36]. The Flesch-Kincaid Grade Level gives a score that refers to the equivalent grade level of education in the USA[37]. For example, a score of 12 indicates that a twelfth grader (aged 17 or 18) in the USA should be able to understand the content.

## Step 6. Quality, functionality, and other assessments

## ***Quality***

Evaluating the quality of apps requires a different approach to using critical appraisal tools or risk of bias measures commonly used in systematic literature reviews. Quality can be assessed using the Mobile App Rating Scale (MARS), which comprises 19 items across four objective scales (engagement, functionality, aesthetics, and information quality) and an additional 4-item subjective quality scale[38]. Each item is rated on a 5-point Likert scale: (1) inadequate, (2) poor, (3) acceptable, (4) good, and (5) excellent. MARS has been translated into several languages, including French, Spanish, German and Italian[39-42] and is suitable for assessing mobile apps for health conditions due to its reliability, validity and objectivity[43]. In all but two of the app reviews we have conducted to date, we have excluded the subjective quality scale to ensure that assessments are as objective as possible. Nevertheless, Stoyanov et al.[38] reported that the objective measures correlated well with the subjective measures. A step-by-step training video on the use of the MARS is available on YouTube[44].

The MARS question ‘Has the app been trialled/tested?’ can be answered by searching for literature on evaluation (e.g., usability, satisfaction or effectiveness) and using more traditional methods, such as risk of bias, to evaluate the quality of the evidence[45]. However, some review teams may wish to take this a step further if the review aims to recommend evidence-based apps to their target population. For example, in our review on strength and balance exercises for older adults[25], we also visited the app/developer websites and contacted the developers directly for information on any evaluations that had taken place concerning the effectiveness of the apps in preventing falls. Due to the absence of evaluations, we compared the interventions promoted by the app with those used in known “gold standard” strength and balance programmes to determine if they had an evidence base.

Researchers may also build on the MARS items to assess the quality of each app in more detail. In one of our reviews, we added predetermined criteria to further evaluate the current state of development of apps for pain assessment and to provide future directions to developers[23]. For example, for the item about customisation, we looked at whether the app provides a setting tool allowing users to change the interface to suit them best. For the interactivity item, we also extracted data on the manikin regarding dimension (2-dimensional or 3-dimensional), orientation (left/right) and gender (male, female or neutral). It is important to note that directly amending the MARS may impact the validity of the tool. However, additional relevant items can further explore the dimensions.

## ***Functionality***

We recommend using the IMS Institute for Healthcare Informatics functionality score to assess the functionality of apps[46]. This records the availability of 11 different functions within an app, rated 1 if they are present and 0 if otherwise (see Table 3). It complements the MARS functionality score, which measures the quality of performance, ease of use, navigation and design of an app using rating scales. The IMS functionality score is calculated from seven main criteria (inform, instruct, record, display, guide, remind or alert and communicate) and four subcategories under the ‘record’ item (collect, share, evaluate, intervene). An overall functionality score, between 0 and 11 for the full scale, is calculated by summing the scores across the individual items. The IMS scale may be tailored to ensure relevance for a specific



1 review; for instance, in our review of handwashing, we omitted the ‘evaluate data’ criteria because it was  
 2 irrelevant to the review topic[19].

3  
4  
5  
6  
7  
8 **Table 3.** IMS Institute for Healthcare Informatics functionality score items and descriptions.  
9  
10

| Items              | Description                                                                                                                                                            |
|--------------------|------------------------------------------------------------------------------------------------------------------------------------------------------------------------|
| 1. Inform          | Provides information in a variety of formats e.g., text, photo, video.                                                                                                 |
| 2. Instruct        | Provides instructions to the user.                                                                                                                                     |
| 3. Record          | Captures user-entered data.                                                                                                                                            |
| 3.1 Collect data   | Able to enter and store health data on individual phone.                                                                                                               |
| 3.2 Share data     | Able to transmit health data.                                                                                                                                          |
| 3.3 Evaluate data  | Able to evaluate the entered data by patient and provider, provider and administrator, or patient and caregiver.                                                       |
| 3.4 Intervene      | Able to send alerts based on the data collected or propose behavioural intervention or changes.                                                                        |
| 4. Display         | Graphically display user-entered data/output user-entered data.                                                                                                        |
| 5. Guide           | Provide guidance based on user-entered information, and may further offer further help e.g., diagnosis, recommend consultation with a doctor or a course of treatment. |
| 6. Remind or alert | Provide reminders to the user.                                                                                                                                         |
| 7. Communicate     | Provide communication between users, consumers or others and/or provide links to social networks.                                                                      |

11  
12  
13  
14  
15  
16  
17  
18  
19  
20  
21  
22  
23  
24  
25  
26  
27  
28  
29  
30  
31  
32  
33  
34  
35  
36  
37  
38  
39  
40  
41  
42  
43  
44  
45  
46  
47  
48  
49  
50  
51  
52  
53  
54  
55  
56  
57  
58  
59  
60

7  
8  
9  
10  
11  
12  
13  
14  
15  
16  
17  
18  
19  
20  
21

Written results from the IMS scale are generally supported with visual representations, such as radar graphs/charts, which map variables onto axes protruding from a central point (see Figure 2). Each axis can represent a different item of the IMS, with values plotted onto each axis. These types of data visualisations could be helpful for clinicians, patients, developers and other stakeholders so they can quickly see which health apps are ranked highly or lowly across a range of evaluation metrics to inform decision-making about which, if any, to use.

### ***Other assessments***

Other ways to evaluate health apps include examining the user reviews of each app on the app stores. Plante et al.[47] took this approach when reviewing blood pressure measuring smartphone apps by downloading the ratings and reviews from the iTunes store and developing a series of narrative themes linked to the high and low-rated apps. Some themes associated with high user ratings included accuracy,

1  
2  
3 1 login functionality, convenience, and successful measurement. In contrast, lower-rated apps were  
4 2 associated with inaccuracy, inability to produce a successful reading, and refunds requested by users. A  
5 3 qualitative approach to understanding the experiences of a range of users can help inform the final  
6 4 evaluation of a range of apps.  
7 5

8 6 Other rating tools include THESIS, developed by evaluating over 200 mHealth apps with a panel of  
9 7 experts[48]. THESIS encompasses six domains: 1) transparency, 2) health content, 3) technical content,  
10 8 4) security/privacy, 5) usability, and 6) subjective rating, which considers other factors like software  
11 9 stability, interoperability, bandwidth, and application size. Additionally, health apps have been evaluated  
12 10 for their security features (e.g., app signing security, encryption schemes, malware presence, permissions,  
13 11 and secure communication adoption) along with users' subjective perceptions of app security[49].  
14 12 However, this approach requires technical expertise to undertake static and dynamic analysis techniques  
15 13 that may be outside some research teams' scope.  
16 14

17 15 Other reviews have also evaluated criteria such as ethical values and medical claims. This includes  
18 16 beneficence, non-maleficence, autonomy, justice, and legal obligation in COVID-19 mobile phone apps  
19 17 following the Systems Wide Analysis of mobile health-related Technologies provided in the NHS Digital  
20 18 Assessment Questionnaire[50] and the medical claims of mental health apps such as scientific language,  
21 19 technical expertise and lived experience perspectives[10].  
22 20

## 23 21 **Step 7. Analysis and synthesis of findings**

24 22

25 23 Data synthesis may be performed by generating descriptive statistics (sums, averages, standard  
26 24 deviations, and percentages) on relevant items or combining these with forms of qualitative synthesis.  
27 25 Previously, we identified the highest-scoring apps regarding functionality and quality, presenting these  
28 26 with a written description of their main features. Interrater reliability can be calculated for the binary IMS  
29 27 Institute for Healthcare Informatics functionality scores using Cohen's Kappa statistic[51] and an intra  
30 28 class correlation coefficient (ICC) can be used to calculate interrater reliability for the ordinal MARS  
31 29 scores[52]. The ICC is the most commonly used statistic for assessing interrater reliability for ordinal  
32 30 variables. We have typically used an absolute agreement 2-way mixed-effects, average-measures  
33 31 model[53], which assumes that the raters are fixed and that systematic differences between raters are  
34 32 relevant.  
35 33

## 36 34 **Patient and public involvement and engagement**

37 35

38 36 None of the commercial health app reviews generated by our research team actively included patients or  
39 37 the public due to pragmatic reasons, including time, resources, and funding constraints. Additionally, we  
40 38 did not identify any health app review recently published in the top medical informatics journals that took  
41 39 this approach. However, patient and public involvement and engagement (PPIE) is viewed favourably by  
42 40 many funders, researchers, and policymakers as it can add value to health research and facilitates its  
43 41 dissemination and impact. As outlined above, all stages of a commercial app review could benefit from  
44 42 the perspectives of patients, carers, and members of the public towards the health apps being evaluated.  
45 43 As with traditional systematic reviews, they could assist with reviewing the protocol, searching,  
46 44 screening, extracting and analysing data[54] and co-production by undertaking quality, usability or other  
47 45  
48 46  
49 47  
50 48  
51 49  
52 50  
53 51  
54 52  
55 53  
56 54  
57 55  
58 56  
59 57  
60 58

1  
2  
3  
4  
5  
6  
7  
8  
9  
10  
11  
12  
13  
14  
15  
16  
17  
18  
19  
20  
21  
22  
23  
24  
25  
26  
27  
28  
29  
30  
31  
32  
33  
34  
35  
36  
37  
38  
39  
40  
41  
42  
43  
44  
45  
46  
47  
48  
49  
50  
51  
52  
53  
54  
55  
56  
57  
58  
59  
60

1 assessments and participating in various dissemination activities. PPIE could provide another valuable  
2 dimension to the process and enrich the results of a commercial health app review.

3  
4 **Key differences between systematic literature reviews and systematic health app reviews**

5  
6 Here, we summarise the main differences between a traditional approach to systematic reviewing  
7 literature versus undertaking a commercial health app review, as outlined in this methodological  
8 discussion (see Table 4).  
9  
10  
11  
12  
13  
14  
15  
16  
17  
18  
19  
20  
21  
22  
23  
24  
25  
26  
27  
28  
29  
30  
31  
32  
33  
34

For peer review only

**Table 4.** Summary of the review stages, contrasting systematic literature review methods with systematic health app review methods.

| <b>Review stage</b>    | <b>Systematic literature review (of effectiveness)</b>                                                                                                                                                                                                                                                                                                                                                         | <b>Systematic commercial health app review</b>                                                                                                                                                                                                                                                                                                                                                                                                                                                                                  |
|------------------------|----------------------------------------------------------------------------------------------------------------------------------------------------------------------------------------------------------------------------------------------------------------------------------------------------------------------------------------------------------------------------------------------------------------|---------------------------------------------------------------------------------------------------------------------------------------------------------------------------------------------------------------------------------------------------------------------------------------------------------------------------------------------------------------------------------------------------------------------------------------------------------------------------------------------------------------------------------|
| Scoping work           | Scoping searches of the published literature usually necessary to inform protocol development, ensure review addresses appropriate questions. Sometimes used to ensure manageable size.                                                                                                                                                                                                                        | Scoping searches of some app stores is essential to determine whether the number of apps available are feasible to review. The research question and the eligibility criteria may be refined iteratively, with multiple scoping searches performed until a reasonable number of apps are identified.                                                                                                                                                                                                                            |
| Protocol development   | Journals increasingly require pre-registration of protocols<br>Dedicated registry for many review types: PROSPERO.<br>Alternatives such as OSF sometimes used.                                                                                                                                                                                                                                                 | There is no formal requirement for protocols to be registered. However, registration on OSF is appropriate and we recommend this.                                                                                                                                                                                                                                                                                                                                                                                               |
| Stakeholder engagement | Varies from none through protocol review to co-development or coproduction; recommended but not required unless a specific design is used or Cochrane review where consumer peer review required.                                                                                                                                                                                                              | Not formally required and most have had no stakeholder engagement. All stages could benefit from stakeholder engagement. Stakeholders could assist with all stages, including co-production by searching, screening, extracting and analysing data.                                                                                                                                                                                                                                                                             |
| Inclusion criteria     | Most reviews include primary research studies. PICOS or SPIDER usually used to define key eligibility criteria for studies.                                                                                                                                                                                                                                                                                    | The novel TECH framework can be used to help determine the eligibility criteria. This considers the Target user, Evaluation focus, Connectedness and Health domain.                                                                                                                                                                                                                                                                                                                                                             |
| Search                 | Searching multiple databases of published literature plus (often) trial registries and/or grey literature. Search strategy, dates and number of records reported for each database. Deduplication of search results in a reference manager. Citation searching also often used. Extensive literature on multiple aspects of searching. Information specialists should be involved.                             | Searching the app market via multiple app stores using basic keywords. Additional sources may include a proprietary software database or publicly available online rating frameworks for health apps that use expert reviewers (e.g., ORCHA). The search information (e.g., app market, date of search and number of apps identified) is often recorded on Excel. Deduplication of search results also often takes place on Excel. Information specialists are not generally involved, given that the search process is simple. |
| Screening              | Screening of search results exported from databases. Uses tools including Endnote, Rayyan, Covidence, EppiReviewer. Two stage process conducted in duplicate at each stage; disagreements resolved through consensus/ consulting third reviewer. Full text excludes listed with reasons or available on request.<br>A PRISMA flowchart is used to visually report the literature search and screening process. | Screening of search results manually extracted into an Excel sheet. Two stage process in which stage 1 includes screening the apps title and description on the app store. Stage 2 includes downloading the app and assessing eligibility. Two reviewers are generally involved and a third may help to reach consensus on any disagreements. Studies excluded at stage 2 are listed with reasons for exclusion.<br>The PRISMA flowchart is often amended and used to report the app search and screening process.              |
| Data extraction        | Data are extracted into a prespecified and piloted form. Tools include Excel, Covidence, Revman, Eppi-Reviewer. Usually, data are extracted by one reviewer and checked by a second, sometimes duplicate extraction is used for some or all data.                                                                                                                                                              | Data are manually extracted into a prespecified form on Excel. Data may be extracted by one reviewer and checked by a second, or the task may be shared between reviewers.                                                                                                                                                                                                                                                                                                                                                      |

|                                                       |                       |                                                                                                                                                                                                                                                                                                                                                                                                                                                                       |                                                                                                                                                                                                                                                                                                                                                                                                                                                                                                                                                           |
|-------------------------------------------------------|-----------------------|-----------------------------------------------------------------------------------------------------------------------------------------------------------------------------------------------------------------------------------------------------------------------------------------------------------------------------------------------------------------------------------------------------------------------------------------------------------------------|-----------------------------------------------------------------------------------------------------------------------------------------------------------------------------------------------------------------------------------------------------------------------------------------------------------------------------------------------------------------------------------------------------------------------------------------------------------------------------------------------------------------------------------------------------------|
| 1<br>2<br>3<br>4<br>5<br>6                            | Data management       | Data may be transformed in various ways and processes may be implemented for the handling of missing data, such as assumption or imputation. There is extensive guidance on methodological approaches to challenges in data management.                                                                                                                                                                                                                               | Not generally relevant for commercial health app reviews. Researchers may contact developers for more information about any evaluations that have taken place.                                                                                                                                                                                                                                                                                                                                                                                            |
| 7<br>8<br>9<br>10<br>11<br>12<br>13<br>14<br>15<br>16 | Quality appraisal     | A wide range of tools for assessment of risk of bias depending on study design and purpose; usually carried out in duplicate with disagreements resolved through consensus/consulting third reviewer. Recorded in Excel, Revman, EppiReviewer. Risk of bias plots can be generated using RevMan or RobVis.<br><br>Increasingly reviews will also use GRADE to rate the certainty of the evidence (from high to very low); this assessment is carried out in GradePRO. | Quality is generally assessed using the Mobile App Rating Scale (MARS) and recorded in Excel. Good practice requires each app to be reviewed independently by two raters. Inter-rater reliability is analysed and presented in the review.                                                                                                                                                                                                                                                                                                                |
| 17<br>18<br>19<br>20<br>21<br>22<br>23<br>24<br>25    | Synthesis             | Meta-analysis may be conducted; Cochrane Handbook is usual source of methods guidance; an extensive literature exists on various aspects of this. Many reviews use narrative synthesis, which Cochrane also offers guidance on, and there is recent guidance on SWiM (Synthesis without Meta-analysis)                                                                                                                                                                | Data synthesis is generally performed descriptively by generating statistics (sums, averages, standard deviations, and percentages) on relevant items. The highest-scoring apps when regarding functionality and quality are also identified. Descriptive summaries may be written for text-based items (e.g., description of the main features). Interrater reliability can be calculated for the IMS Institute for Healthcare Informatics functionality scores using Cohen's Kappa statistic and an intraclass correlation coefficient for MARS scores. |
| 26<br>27<br>28<br>29<br>30<br>31                      | Data presentation     | Meta-analyses (and sometimes non-pooled data) are presented using forest plots, often with risk of bias plots displayed alongside. Risk of bias results displayed using bespoke figures (see above); GRADE results typically displayed using Summary of Findings Tables                                                                                                                                                                                               | Data tends to be presented as descriptive summaries and Tables. Bespoke figures can also be created. Data pertaining to the IMS Institute for Healthcare Informatics functionality score is often presented as a radar graph/chart. Inter-rater reliability statistics are presented for both the MARS quality appraisals and the IMS Institute for Healthcare Informatics functionality scores.                                                                                                                                                          |
| 32<br>33<br>34<br>35<br>36<br>37                      | Updating and currency | Reviews should generally have a search date within the last 12 months at submission for publication. Search updates can usually be implemented by re-running searches with the relevant date limit: new records will be identified but old one will not be lost (the process is additive) (an exception may be the grey literature in some cases).                                                                                                                    | Apps emerge, are updated, and disappear very quickly, so app reviews should be conducted and published as promptly as possible. New or updated searches in app stores will likely yield very different results, so updating a review is difficult.                                                                                                                                                                                                                                                                                                        |
| 38                                                    | Reporting             | PRISMA checklist                                                                                                                                                                                                                                                                                                                                                                                                                                                      | There are currently no formal reporting guidelines for health app reviews.                                                                                                                                                                                                                                                                                                                                                                                                                                                                                |
| 39<br>40<br>41<br>42                                  | Guidance resources    | Cochrane Handbook and other guidance for specific review types                                                                                                                                                                                                                                                                                                                                                                                                        | No formal guidance resources are available. There is a YouTube video for how to use the Mobile App Rating Scale (MARS) to assess app quality.                                                                                                                                                                                                                                                                                                                                                                                                             |

## DISCUSSION

This methods paper outlines the 7-step process for conducting systematic reviews of commercial health apps. Through comparison with systematic literature reviews, we explore the complexities of each stage of an app review and provide suggestions on how to formulate a research question, develop and run scoping searches, register the protocol, determine the eligibility criteria, conduct the final search and screening, extract data, perform quality assessments and synthesise the findings. We also propose that the novel TECH framework is adopted to allow a standardised specification to be developed and applied in health app reviews, similar to using PICO, SPICE, or SPIDER in traditional systematic reviews[27]. Additionally, we highlight the potential for PPIE activities within health app reviews.

Although health app reviews share core features with systematic reviews, three key differences warrant discussion. Firstly, commercial health apps, and reviews of these, are more transitory with rapid changes in the mHealth landscape that private industry providers dominate. For example, the geographical and price specificity of app sources are not replicable in the same way that evidence sources for systematic reviews are, and apps can appear, change and disappear quickly, impacting the replicability of the search results. Authors must be aware of the need to report granular details of their searches and to publish their review within a reasonable time from the search date, such as by using preprint servers while peer-review in a scientific journal takes place. Furthermore, the resources available to the review team are more critical than in systematic reviewing, so it is essential to transparently document scoping searches and iterative adjustments to review scope and inclusion criteria[55].

Secondly, the critical appraisal process for health app reviews requires a radically different approach to quality assessment, with multiple approaches and tools (e.g., MARS) being used. This proliferation of assessment approaches means there is no 'gold standard' equivalent to the Cochrane Risk of Bias tool for RCTs in systematic reviews[45, 56]. There is also no equivalent to the wider consideration of evidence certainty which is provided by GRADE in systematic reviews[57]. Researchers must select an approach that best fits the review aims. Additionally, they may need to consider national standards within some countries, such as those from the UK National Institute for Health Research on digital health technologies evaluation[58], which may require specific approaches for the review context.

The third significant difference between systematic literature and health app reviews is the extent to which guidance, guidelines, and infrastructure support them. The methodological and reporting guidance for health app reviews is in its infancy. In contrast, an extensive body of literature outlining methods for different types of systematic and now scoping and rapid reviews exists[59-61]. There are also clear reporting guidelines for systematic reviews, which have been expanded to scoping reviews but are lacking for health app reviews[30, 62]. While we are undertaking research to develop methods and reporting guidance for app reviews, systematic review guidance should be referred to and adapted as necessary as an interim measure. Ultimately, there may also be a need for a tool which will allow critical appraisal of these types of mHealth reviews to parallel those that exist for systematic reviews such as AMSTAR-2[63] or ROBIS[64].

We propose that this outline will guide the conduct of good quality app reviews that can inform healthcare practitioners, patients, carers, health service managers, educators, and policymakers. We also recommend the prospective registration of an app review protocol on OSF as a suitable alternative to



1  
2  
3 1 PROSPERO where systematic review protocols are held[65], and the use of preprint servers to make app  
4 2 reviews openly available online, allowing for rapid dissemination of findings ahead of journal  
5 3 publication.

#### 4 **Implications**

5  
6 6 This outline will help ensure that others can easily replicate the methods and that future app reviews are  
7 7 conducted in a standardised and rigorous manner. However, while outlining the method, we noted gaps in  
8 8 conducting and reporting commercial health app reviews that need addressing. Hence, we are developing  
9 9 reporting guidelines for systematic health app reviews and plan on developing a quality appraisal tool.  
10 10 Similar to the 27-item PRISMA guideline for systematic reviews[30] and the 22-item PRISMA-Scr  
11 11 guideline for scoping reviews[62], our guideline will consist of a structured list of items that should be  
12 12 included when reporting commercial health app reviews.

13  
14 14 For those conducting commercial health app reviews, there is an opportunity for the inclusion of  
15 15 stakeholders to strengthen the quality and impact of their findings. This is particularly beneficial if the  
16 16 intended target audience experiences barriers when using health apps, as clear recommendations from an  
17 17 app review can help to improve the design and function of future versions of an app. Researchers should  
18 18 also be aware of the context in which the review is being conducted. Namely, companies owning the apps  
19 19 may use the review for business development and promotion opportunities or contest the quality scores.  
20 20 However, this highlights an opportunity for further stakeholder engagement: researchers could collaborate  
21 21 or consult with developers to ensure that the product aligns with the research assessment process of an  
22 22 app's quality. This has the potential to influence and promote accessibility and quality as aspects of  
23 23 development that might not be considered otherwise. Whilst industry developers focus on creating a  
24 24 commercially viable product, understanding this review process will potentially enhance and refine their  
25 25 development process to create a superior app than initially proposed.

#### 26 27 **Strengths and limitations**

28  
29 29 This methodological discussion has numerous strengths, such as an experienced research team who have  
30 30 conducted various health app reviews and numerous types of traditional literature and systematic reviews.  
31 31 This was supplemented by identifying and including relevant app reviews from the top medical  
32 32 informatics journals and a robust analysis and comparison between traditional systematic reviews and  
33 33 commercial health app reviews. However, a systematic search of health app reviews was not undertaken,  
34 34 nor did we focus on the emerging field of extended reality (i.e., virtual, augmented, and mixed reality)  
35 35 and their corresponding apps, many of which are health-related and available in other app stores (e.g.,  
36 36 Steam and Oculus/Meta). Additionally, our app reviews focussed on apps for clients (e.g., patients or the  
37 37 public) and healthcare providers rather than for the health system or data services, which are also target  
38 38 users of digital interventions[66]. It is likely that the recommendations in this discussion about evaluating  
39 39 commercially available mHealth apps will also apply to other health apps, including extended reality, and  
40 40 could support researchers working in these fields.

#### 41 42 **CONCLUSION**

1  
2  
3 1 Reviews of commercial apps can provide insights into the availability of apps for a specific health topic,  
4 2 including their quality and functionality. We have proposed a 7-step method in an effort to standardise the  
5 3 process of conducting mHealth reviews. At each step, we have discussed the methods in contrast to  
6 4 systematic literature reviews, given that the process should similarly be systematic and robust. We have  
7 5 also introduced the novel TECH acronym, which will assist researchers with writing research questions  
8 6 for app reviews and determining the eligibility criteria. Through ongoing collaboration, we will continue  
9 7 to advocate for transparency and quality in app reviews by working on reporting guidelines and a quality  
10 8 appraisal tool.  
11 9

12 10 **FUNDING:** NG, DD, GN, CE-T and SMA are funded by the National Institute for Health and Care  
13 11 Research Applied Research Collaboration Greater Manchester (NIHR ARC GM). LM is supported by a  
14 12 National Institute for Health and Care Research Senior Investigator Award to Professor Chris Todd  
15 13 (Reference NIHR200299). The views expressed in this publication are those of the authors and not  
16 14 necessarily those of the National Institute for Health and Care Research or the Department of Health and  
17 15 Social Care.  
18 16

19 17 **CONFLICTS OF INTEREST:** None.  
20 18

21 19 **PATIENT AND PUBLIC INVOLVEMENT:** Members of the public were not involved.  
22 20

23 21 **ETHICS:** Ethics approval was not required.  
24 22

25 23 **AUTHOR CONTRIBUTIONS:** NG and DD conceptualised the paper. All authors made intellectual  
26 24 contributions and contributed to writing the paper. All authors approved the final manuscript.  
27 25

28 26 **PATIENT CONSENT FOR PUBLICATION:** Not required.  
29 27

## 30 28 REFERENCES

- 31 29 1. Mayer, M.A., O. Rodríguez Blanco, and A. Torrejon, Use of Health Apps by Nurses for  
32 30 Professional Purposes: Web-Based Survey Study. *JMIR Mhealth Uhealth*, 2019. **7**(11): p.  
33 31 e15195.
- 34 32 2. Bates, D.W., A. Landman, and D.M. Levine, Health Apps and Health Policy: What Is Needed?  
35 33 *Jama*, 2018. **320**(19): p. 1975-1976.
- 36 34 3. Dsouza, S.M., et al., Effectiveness of self-management applications in improving clinical health  
37 35 outcomes and adherence among diabetic individuals in low and middle-income countries: a  
38 36 systematic review. *BMJ Open*, 2022. **12**(11): p. e060108.
- 39 37 4. Doumen, M., et al., Engagement and attrition with eHealth tools for remote monitoring in chronic  
40 38 arthritis: a systematic review and meta-analysis. *RMD Open*, 2022. **8**(2).
- 41 39 5. De Santis, K.K., et al., Evaluation of Digital Interventions for Physical Activity Promotion:  
42 40 Scoping Review. *JMIR Public Health Surveill*, 2022. **8**(5): p. e37820.
- 43 41 6. Chew, H.S.J., et al., Sustainability of Weight Loss Through Smartphone Apps: Systematic  
44 42 Review and Meta-analysis on Anthropometric, Metabolic, and Dietary Outcomes. *J Med Internet*  
45 43 *Res*, 2022. **24**(9): p. e40141.
- 46 44 7. Dasgupta, N., A. Lazard, and J.S. Brownstein, Covid-19 vaccine apps should deliver more to  
47 45 patients. *Lancet Digit Health*, 2021. **3**(5): p. e278-e279.

- 1
- 2
- 3
- 4 1 8. Lee, M., et al., Mobile App-Based Health Promotion Programs: A Systematic Review of the
- 5 2 Literature. *Int J Environ Res Public Health*, 2018. **15**(12).
- 6 3 9. World Health Organisation. Applications. 2022 [cited 2023 10/01/2023]; Available from:
- 7 4 <https://www.who.int/news-room/apps>.
- 8 5 10. Larsen, M.E., et al., Using science to sell apps: Evaluation of mental health app store quality
- 9 6 claims. *NPJ Digit Med*, 2019. **2**: p. 18.
- 10 7 11. Moshi, M.R., R. Tooher, and T. Merlin, SUITABILITY OF CURRENT EVALUATION
- 11 8 FRAMEWORKS FOR USE IN THE HEALTH TECHNOLOGY ASSESSMENT OF MOBILE
- 12 9 MEDICAL APPLICATIONS: A SYSTEMATIC REVIEW. *Int J Technol Assess Health Care*,
- 13 10 2018. **34**(5): p. 464-475.
- 14 11 12. Henson, P., et al., Deriving a practical framework for the evaluation of health apps. *Lancet Digit*
- 15 12 *Health*, 2019. **1**(2): p. e52-e54.
- 16 13 13. Lagan, S., et al., Actionable health app evaluation: translating expert frameworks into objective
- 17 14 metrics. *NPJ Digit Med*, 2020. **3**: p. 100.
- 18 15 14. Nouri, R., et al., Criteria for assessing the quality of mHealth apps: a systematic review. *J Am*
- 19 16 *Med Inform Assoc*, 2018. **25**(8): p. 1089-1098.
- 20 17 15. Manta, C., et al., EVIDENCE Publication Checklist for Studies Evaluating Connected Sensor
- 21 18 Technologies: Explanation and Elaboration. *Digit Biomark*, 2021. **5**(2): p. 127-147.
- 22 19 16. Agarwal, S., et al., Guidelines for reporting of health interventions using mobile phones: mobile
- 23 20 health (mHealth) evidence reporting and assessment (mERA) checklist. *Bmj*, 2016. **352**: p. i1174.
- 24 21 17. Eysenbach, G., CONSORT-EHEALTH: improving and standardizing evaluation reports of Web-
- 25 22 based and mobile health interventions. *J Med Internet Res*, 2011. **13**(4): p. e126.
- 26 23 18. Weisel, K.K., et al., Standalone smartphone apps for mental health-a systematic review and meta-
- 27 24 analysis. *NPJ Digit Med*, 2019. **2**: p. 118.
- 28 25 19. Gasteiger, N., et al., Sticky apps, not sticky hands: A systematic review and content synthesis of
- 29 26 hand hygiene mobile apps. *J Am Med Inform Assoc*, 2021. **28**(9): p. 2027-2038.
- 30 27 20. Gasteiger, N., et al., Patient-facing genetic and genomic mobile apps in the UK: a systematic
- 31 28 review of content, functionality, and quality. *J Community Genet*, 2022. **13**(2): p. 171-182.
- 32 29 21. Paripoorani, D., et al., A systematic review of menopause apps with an emphasis on osteoporosis
- 33 30 in progress.
- 34 31 22. Vercell, A., et al., Patient-facing cancer mobile apps that enable patient reported outcome data to
- 35 32 be collected: A systematic review of content, functionality, quality, and ability to integrate with
- 36 33 electronic health records. *Int J Med Inform*, 2022. **170**: p. 104931.
- 37 34 23. Ali, S.M., et al., Digital manikins to self-report pain on a smartphone: A systematic review of
- 38 35 mobile apps. *Eur J Pain*, 2021. **25**(2): p. 327-338.
- 39 36 24. Pearsons, A., et al., Atrial fibrillation self-management: a mobile telephone app scoping review
- 40 37 and content analysis. *Eur J Cardiovasc Nurs*, 2021. **20**(4): p. 305-314.
- 41 38 25. McGarrigle, L., E. Boulton, and C. Todd, Map the apps: a rapid review of digital approaches to
- 42 39 support the engagement of older adults in strength and balance exercises. *BMC Geriatr*, 2020.
- 43 40 **20**(1): p. 483.
- 44 41 26. Booth, A., et al., The nuts and bolts of PROSPERO: an international prospective register of
- 45 42 systematic reviews. *Systematic Reviews*, 2012. **1**(1): p. 2.
- 46 43 27. Cooke, A., D. Smith, and A. Booth, Beyond PICO: the SPIDER tool for qualitative evidence
- 47 44 synthesis. *Qual Health Res*, 2012. **22**(10): p. 1435-43.
- 48 45 28. Parmar, P., et al., Health-focused conversational agents in person-centered care: a review of apps.
- 49 46 *NPJ Digit Med*, 2022. **5**(1): p. 21.
- 50 47 29. Carlo, A.D., et al., By the numbers: ratings and utilization of behavioral health mobile
- 51 48 applications. *npj Digital Medicine*, 2019. **2**(1): p. 54.
- 52 49 30. Page, M.J., et al., The PRISMA 2020 statement: an updated guideline for reporting systematic
- 53 50 reviews. *Bmj*, 2021. **372**: p. n71.
- 54 51
- 55 52
- 56 53
- 57 54
- 58 55
- 59 56
- 60 57

- 1 31. Rajani, N.B., et al., Use of gamification strategies and tactics in mobile applications for smoking  
2 cessation: a review of the UK mobile app market. *BMJ Open*, 2019. **9**(6): p. e027883.
- 3 32. Internet Society. Best Practices: Privacy. 2019; Available from:  
4 <https://www.internetsociety.org/resources/ota/2019/best-practices-privacy/>.
- 5 33. Michie, S., et al., The behavior change technique taxonomy (v1) of 93 hierarchically clustered  
6 techniques: building an international consensus for the reporting of behavior change  
7 interventions. *Ann Behav Med*, 2013. **46**(1): p. 81-95.
- 8 34. Lalloo, C., et al., Commercially Available Smartphone Apps to Support Postoperative Pain Self-  
9 Management: Scoping Review. *JMIR Mhealth Uhealth*, 2017. **5**(10): p. e162.
- 10 35. Grainger, R., et al., Apps for People With Rheumatoid Arthritis to Monitor Their Disease  
11 Activity: A Review of Apps for Best Practice and Quality. *JMIR Mhealth Uhealth*, 2017. **5**(2): p.  
12 e7.
- 13 36. Flesch, R., *How to Write Plain English: A Book for Lawyers and Consumers*. 1979, New York:  
14 Harper & Row.
- 15 37. Kincaid, J., et al., Derivation Of New Readability Formulas (Automated Readability Index, Fog  
16 Count And Flesch Reading Ease Formula) For Navy Enlisted Personnel. Research Branch Report  
17 8-75. 1975, Naval Technical Training, U. S. Naval Air Station: Millington, TN.
- 18 38. Stoyanov, S.R., et al., Development and Validation of the User Version of the Mobile Application  
19 Rating Scale (uMARS). *JMIR Mhealth Uhealth*, 2016. **4**(2): p. e72.
- 20 39. Domnich, A., et al., Development and validation of the Italian version of the Mobile Application  
21 Rating Scale and its generalisability to apps targeting primary prevention. *BMC Med Inform  
22 Decis Mak*, 2016. **16**: p. 83.
- 23 40. Martin Payo, R., et al., Spanish adaptation and validation of the Mobile Application Rating Scale  
24 questionnaire. *Int J Med Inform*, 2019. **129**: p. 95-99.
- 25 41. Messner, E.M., et al., The German Version of the Mobile App Rating Scale (MARS-G):  
26 Development and Validation Study. *JMIR Mhealth Uhealth*, 2020. **8**(3): p. e14479.
- 27 42. Saliasi, I., et al., Promoting Health via mHealth Applications Using a French Version of the  
28 Mobile App Rating Scale: Adaptation and Validation Study. *JMIR Mhealth Uhealth*, 2021. **9**(8):  
29 p. e30480.
- 30 43. Terhorst, Y., et al., Validation of the Mobile Application Rating Scale (MARS). *PLoS One*, 2020.  
31 **15**(11): p. e0241480.
- 32 44. Stoyanov, S. MARS training video. 2016; Available from:  
33 <https://www.youtube.com/watch?v=25vBwJQIOcE>.
- 34 45. Higgins, J.P., et al., The Cochrane Collaboration's tool for assessing risk of bias in randomised  
35 trials. *Bmj*, 2011. **343**: p. d5928.
- 36 46. Aitken, M. and C. Gauntlett. *IMS Institute for Healthcare Informatics: Patient Apps for Improved  
37 Healthcare: From Novelty to Mainstream*. 2013; Available from: [http://ignacoriesgo.es/wp-  
38 content/uploads/2014/03/iihi\\_patient\\_apps\\_report\\_editora\\_39\\_2\\_1.pdf](http://ignacoriesgo.es/wp-content/uploads/2014/03/iihi_patient_apps_report_editora_39_2_1.pdf).
- 39 47. Plante, T.B., et al., Trends in user ratings and reviews of a popular yet inaccurate blood pressure-  
40 measuring smartphone app. *J Am Med Inform Assoc*, 2018. **25**(8): p. 1074-1079.
- 41 48. Levine, D.M., et al., Design and testing of a mobile health application rating tool. *NPJ Digit Med*,  
42 2020. **3**: p. 74.
- 43 49. Tangari, G., et al., Analyzing security issues of android mobile health and medical applications. *J  
44 Am Med Inform Assoc*, 2021. **28**(10): p. 2074-2084.
- 45 50. Chidambaram, S., et al., Observational study of UK mobile health apps for COVID-19. *Lancet  
46 Digit Health*, 2020. **2**(8): p. e388-e390.
- 47 51. McHugh, M.L., Interrater reliability: the kappa statistic. *Biochem Med (Zagreb)*, 2012. **22**(3): p.  
48 276-82.
- 49 52. Hallgren, K.A., Computing Inter-Rater Reliability for Observational Data: An Overview and  
50 Tutorial. *Tutor Quant Methods Psychol*, 2012. **8**(1): p. 23-34.

- 1  
2  
3 1 53. Shrout, P.E. and J.L. Fleiss, Intraclass correlations: uses in assessing rater reliability. Psychol Bull, 1979. **86**(2): p. 420-8.
- 4 2  
5 3 54. Serrano-Aguilar, P., et al., Patient involvement in health research: a contribution to a systematic review on the effectiveness of treatments for degenerative ataxias. Soc Sci Med, 2009. **69**(6): p. 920-5.
- 6 4  
7 5  
8 6 55. Nussbaumer-Streit, B., et al., Resource use during systematic review production varies widely: a scoping review. Journal of Clinical Epidemiology, 2021. **139**: p. 287-296.
- 9 7  
10 8 56. Sterne, J.A.C., et al., RoB 2: a revised tool for assessing risk of bias in randomised trials. BMJ, 2019. **366**: p. l4898.
- 11 9  
12 10 57. Guyatt, G., et al., GRADE guidelines: 1. Introduction&#x2014;GRADE evidence profiles and summary of findings tables. Journal of Clinical Epidemiology, 2011. **64**(4): p. 383-394.
- 13 11  
14 12 58. National Institute for Health and Care Excellence. Evidence standards framework (ESF) for digital health technologies. 2022; Available from: <https://www.nice.org.uk/about/what-we-do/our-programmes/evidence-standards-framework-for-digital-health-technologies#how-use>.
- 15 13  
16 14 59. Higgins, J., et al., Cochrane Handbook for Systematic Reviews of Interventions version 6.3. 2022, Cochrane: [www.training.cochrane.org/handbook](http://www.training.cochrane.org/handbook).
- 17 15  
18 16 60. Garritty, C., et al., Cochrane Rapid Reviews Methods Group offers evidence-informed guidance to conduct rapid reviews. Journal of Clinical Epidemiology, 2021. **130**: p. 13-22.
- 19 17  
20 18 61. Peters, M.D.J., et al., Updated methodological guidance for the conduct of scoping reviews. JBI Evid Synth, 2020. **18**(10): p. 2119-2126.
- 21 19  
22 20 62. Tricco, A., et al., PRISMA extension for scoping reviews (PRISMA-ScR): checklist and explanation. Ann Intern Med, 2018. **169**(7): p. 467-473.
- 23 21  
24 22 63. Shea, B.J., et al., AMSTAR 2: a critical appraisal tool for systematic reviews that include randomised or non-randomised studies of healthcare interventions, or both. BMJ, 2017. **358**: p. j4008.
- 25 23  
26 24 64. Whiting, P., et al., ROBIS: A new tool to assess risk of bias in systematic reviews was developed. Journal of clinical epidemiology, 2016. **69**: p. 225-234.
- 27 25  
28 26 65. Booth, A., et al., PROSPERO at one year: an evaluation of its utility. Systematic Reviews, 2013. **2**(1): p. 4.
- 29 27  
30 28 66. World Health Organization, Classification of digital health interventions. 2018: Geneva.
- 31 29  
32 30  
33 31  
34 32  
35 33

## 36 33 **FIGURE LEGENDS**

37 34  
38 35 **Figure 1.** TECH framework with a worked example.

39 36  
40 37 **Figure 2.** Simulated radar graph mapping the 11 IMS criteria.

41 38  
42  
43  
44  
45  
46  
47  
48  
49  
50  
51  
52  
53  
54  
55  
56  
57  
58  
59  
60



|          |                         |                                                                                                                                                                                                          |
|----------|-------------------------|----------------------------------------------------------------------------------------------------------------------------------------------------------------------------------------------------------|
| <b>T</b> | <b>Target user</b>      | <b>Example:</b> Adults aged 18 years and above                                                                                                                                                           |
| <b>E</b> | <b>Evaluation focus</b> | <b>Example:</b> Self-management capabilities<br><i>e.g., behaviour change, consultations, education, medication management, peer support, symptom control, tracking physical mental or social health</i> |
| <b>C</b> | <b>Connectedness</b>    | <b>Example:</b> Standalone app, not connected to wearables, other devices, software applications or human-driven services                                                                                |
| <b>H</b> | <b>Health domain</b>    | <b>Example:</b> Atrial fibrillation                                                                                                                                                                      |

miro

Figure 1. TECH framework with a worked example.

863x575mm (72 x 72 DPI)



1  
2  
3  
4  
5  
6  
7  
8  
9  
10  
11  
12  
13  
14  
15  
16  
17  
18  
19  
20  
21  
22  
23  
24  
25  
26  
27  
28  
29  
30  
31  
32  
33  
34  
35  
36  
37  
38  
39  
40  
41  
42  
43  
44  
45  
46  
47  
48  
49  
50  
51  
52  
53  
54  
55  
56  
57  
58  
59  
60

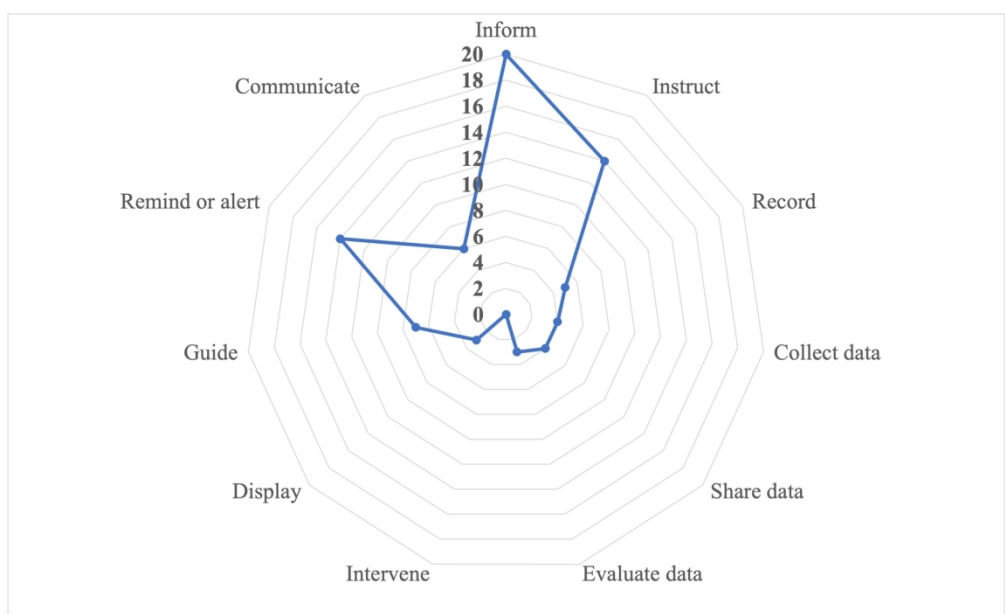

Figure 2. Simulated radar graph mapping the 11 IMS criteria.

222x134mm (300 x 300 DPI)

# BMJ Open

## Conducting a systematic review and evaluation of commercially available mobile applications (apps) on a health-related topic: the TECH approach and a step-by-step methodological guide

|                                 |                                                                                                                                                                                                                                                                                                                                                                                                                                                                                                                                                                                                                                                                                                                                                                                                                                                                                                                                                                                                                                       |
|---------------------------------|---------------------------------------------------------------------------------------------------------------------------------------------------------------------------------------------------------------------------------------------------------------------------------------------------------------------------------------------------------------------------------------------------------------------------------------------------------------------------------------------------------------------------------------------------------------------------------------------------------------------------------------------------------------------------------------------------------------------------------------------------------------------------------------------------------------------------------------------------------------------------------------------------------------------------------------------------------------------------------------------------------------------------------------|
| Journal:                        | <i>BMJ Open</i>                                                                                                                                                                                                                                                                                                                                                                                                                                                                                                                                                                                                                                                                                                                                                                                                                                                                                                                                                                                                                       |
| Manuscript ID                   | bmjopen-2023-073283.R1                                                                                                                                                                                                                                                                                                                                                                                                                                                                                                                                                                                                                                                                                                                                                                                                                                                                                                                                                                                                                |
| Article Type:                   | Communication                                                                                                                                                                                                                                                                                                                                                                                                                                                                                                                                                                                                                                                                                                                                                                                                                                                                                                                                                                                                                         |
| Date Submitted by the Author:   | 04-May-2023                                                                                                                                                                                                                                                                                                                                                                                                                                                                                                                                                                                                                                                                                                                                                                                                                                                                                                                                                                                                                           |
| Complete List of Authors:       | Gasteiger, Norina; The University of Manchester, Division of Nursing, Midwifery and Social Work; Division of Informatics, Imaging and Data Sciences<br>Dowding, Dawn; The University of Manchester, Division of Nursing, Midwifery and Social Work<br>Norman, Gill; The University of Manchester, Division of Nursing, Midwifery and Social Work<br>McGarrigle, Lisa; The University of Manchester, Division of Nursing, Midwifery and Social Work; Manchester Academic Health Science Centre<br>East-Telling, Charlotte; The University of Manchester, Division of Nursing, Midwifery and Social Work<br>Jones, Debra; The University of Manchester, Division of Nursing, Midwifery and Social Work<br>Vercell, Amy; The University of Manchester, Division of Nursing, Midwifery and Social Work; The Christie NHS Foundation Trust<br>Ali, Syed; The University of Manchester, Division of Informatics, Imaging and Data Sciences<br>O'Connor, Siobhan; The University of Manchester, School of Nursing, Midwifery and Social Work |
| <b>Primary Subject Heading</b>: | Research methods                                                                                                                                                                                                                                                                                                                                                                                                                                                                                                                                                                                                                                                                                                                                                                                                                                                                                                                                                                                                                      |
| Secondary Subject Heading:      | Health informatics                                                                                                                                                                                                                                                                                                                                                                                                                                                                                                                                                                                                                                                                                                                                                                                                                                                                                                                                                                                                                    |
| Keywords:                       | Telemedicine < BIOTECHNOLOGY & BIOINFORMATICS, Systematic Review, Health informatics < BIOTECHNOLOGY & BIOINFORMATICS, Information technology < BIOTECHNOLOGY & BIOINFORMATICS, STATISTICS & RESEARCH METHODS                                                                                                                                                                                                                                                                                                                                                                                                                                                                                                                                                                                                                                                                                                                                                                                                                         |
|                                 |                                                                                                                                                                                                                                                                                                                                                                                                                                                                                                                                                                                                                                                                                                                                                                                                                                                                                                                                                                                                                                       |

SCHOLARONE™  
Manuscripts

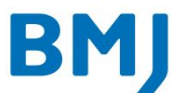

I, the Submitting Author has the right to grant and does grant on behalf of all authors of the Work (as defined in the below author licence), an exclusive licence and/or a non-exclusive licence for contributions from authors who are: i) UK Crown employees; ii) where BMJ has agreed a CC-BY licence shall apply, and/or iii) in accordance with the terms applicable for US Federal Government officers or employees acting as part of their official duties; on a worldwide, perpetual, irrevocable, royalty-free basis to BMJ Publishing Group Ltd ("BMJ") its licensees and where the relevant Journal is co-owned by BMJ to the co-owners of the Journal, to publish the Work in BMJ Open and any other BMJ products and to exploit all rights, as set out in our [licence](#).

The Submitting Author accepts and understands that any supply made under these terms is made by BMJ to the Submitting Author unless you are acting as an employee on behalf of your employer or a postgraduate student of an affiliated institution which is paying any applicable article publishing charge ("APC") for Open Access articles. Where the Submitting Author wishes to make the Work available on an Open Access basis (and intends to pay the relevant APC), the terms of reuse of such Open Access shall be governed by a Creative Commons licence – details of these licences and which [Creative Commons](#) licence will apply to this Work are set out in our licence referred to above.

Other than as permitted in any relevant BMJ Author's Self Archiving Policies, I confirm this Work has not been accepted for publication elsewhere, is not being considered for publication elsewhere and does not duplicate material already published. I confirm all authors consent to publication of this Work and authorise the granting of this licence.

# 1 Conducting a systematic review and evaluation of commercially available mobile 2 applications (apps) on a health-related topic: the TECH approach and a step-by- 3 step methodological guide

## 4 5 Authors

6 Norina Gasteiger, MPH, PhD fellow<sup>1,2</sup>

7  
8 Dawn Dowding, PhD, Professor in Clinical Decision-Making<sup>1</sup>

9  
10 Gill Norman, PhD, Research Fellow<sup>1</sup>

11  
12 Lisa McGarrigle, PhD, Research Fellow<sup>1,3</sup>

13  
14 Charlotte Eost-Telling, PhD, Research Fellow<sup>1</sup>

15  
16 Debra Jones, MSc, Research Associate<sup>1</sup>

17  
18 Amy Vercell, MSc, Research Associate<sup>1,4</sup>

19  
20 Syed Mustafa Ali, MPH, Research Associate<sup>2</sup>

21  
22 Siobhan O'Connor, PhD, Senior Lecturer<sup>1</sup>

23  
24 1. Division of Nursing, Midwifery and Social Work, School of Health Sciences, The University of  
25 Manchester, Manchester, United Kingdom

26 2. Division of Informatics, Imaging & Data Sciences, School of Health Sciences, The University of  
27 Manchester, Manchester, United Kingdom

28 3. Manchester Academic Health Science Centre, Manchester, M13 9NQ, United Kingdom

29 4. The Christie NHS Foundation Trust, Wilmslow Road, Manchester, M20 4BX

30 **Corresponding author:** Norina Gasteiger, [norina.gasteiger@manchester.ac.uk](mailto:norina.gasteiger@manchester.ac.uk)

## 31 ORCiDs:

32 NG: 0000-0001-7801-7417

33 DD: 0000-0001-5672-8605

34 GN: 0000-0002-3972-5733

35 LM: 0000-0002-0533-3029

36 CE-T: 0000-0002-9568-3195

37 DJ: 0000-0003-1479-3622

38 AV: 0000-0002-4121-6524

39 SMA: 0000-0001-9393-9049

40 SO: 0000-0001-8579-1718

41  
42 **Word count:** 6293

## 1 ABSTRACT

2  
3  
4  
5  
6  
7  
8  
9  
10  
11  
12  
13  
14  
15  
16  
17  
18  
19  
20  
21  
22  
23  
24  
25  
26  
27  
28  
29  
30  
31  
32  
33  
34  
35  
36  
37  
38  
39  
40  
41  
42  
43  
44  
45  
46  
47  
48  
49  
50  
51  
52  
53  
54  
55  
56  
57  
58  
59  
60

**Objectives:** To provide an overview of the methodological considerations for conducting commercial smartphone health app reviews (mHealth reviews), with the aim of systematising the process and supporting high-quality evaluations of mHealth apps.

**Design:** Synthesis of our research team's experiences of conducting and publishing various reviews of mHealth apps available on app stores and hand-searching the top medical informatics journals (e.g., The Lancet Digital Health, npj Digital Medicine, Journal of Biomedical Informatics, and the Journal of the American Medical Informatics Association) over the last five years (2018-2022) to identify other app reviews to contribute to the discussion of this method and supporting framework for developing a research (review) question and determining the eligibility criteria.

**Results:** We present seven steps to support rigour in conducting reviews of health apps available on the app market: 1) writing a research question or aims, 2) conducting scoping searches and developing the protocol, 3) determining the eligibility criteria using the TECH framework, 4) conducting the final search and screening of health apps, 5) data extraction, 6) quality, functionality, and other assessments and 7) analysis and synthesis of findings. We introduce the novel TECH approach to developing review questions and the eligibility criteria, which considers the Target user, Evaluation focus, Connectedness, and the Health domain. Patient and public involvement and engagement opportunities are acknowledged, including co-developing the protocol and undertaking quality or usability assessments.

**Conclusion:** Commercial mHealth app reviews can provide important insights into the health app market, including the availability of apps and their quality and functionality. We have outlined seven key steps for conducting rigorous health app reviews in addition to the TECH acronym, which can support researchers in writing research questions and determining the eligibility criteria. Future work will include a collaborative effort to develop reporting guidelines and a quality appraisal tool to ensure transparency and quality in systematic app reviews.

**KEYWORDS:** Mobile applications; Smartphone; Telemedicine; mHealth; Systematic review; Method

## STRENGTHS AND LIMITATIONS

- We leveraged the expertise of an experienced research team who have conducted various health app and systematic reviews to provide interim recommendations for good practice, based on seven key steps, to support standardised health app review methods and develop approaches to best practice in the mHealth field.
- Relevant literature from key medical informatics journals was screened to present a robust analysis and comparison between systematic reviews and app reviews in health.
- We propose TECH, a novel framework for constructing review questions and refining eligibility criteria in health app reviews.
- This work focuses on mobile apps and does not include the emerging fields of virtual reality, augmented reality, or mixed-reality apps.
- The methods presented are informed by existing app reviews, which have primarily focused on client-facing apps (e.g., for patients, the public, or healthcare providers) rather than for the health system or data services, which are also key target users.

## 1 INTRODUCTION

2 With the rise in the use of smartphones and other mobile technologies, there has been an increase in the  
3 availability of health applications (mHealth apps) designed to be used by individuals for various health  
4 issues. Health apps can also support health and care professionals in their daily clinical practice by  
5 providing decision support, access to clinical guidelines, and education and training[1]. In 2018, over  
6 325,000 health apps were developed[2], covering many health conditions and targeted behaviours. For  
7 example, mHealth apps can help to support self-management of conditions like diabetes[3], facilitate  
8 remote monitoring of patients with chronic conditions[4], or support patients with general behaviour  
9 change such as increasing/monitoring physical activity[5] or dietary change[6]. Some health apps also  
10 support public health initiatives, such as promoting healthy lifestyles and encouraging the uptake of  
11 screening and vaccination programmes[7, 8]. The World Health Organization (WHO) have released  
12 mHealth apps to educate people about road safety, sun protection measures, and COVID-19[9]. However,  
13 concerns have been raised about the quality of advice and support such health apps provide[10]. Bates et  
14 al. also highlight concerns with the accuracy of apps designed to support medical diagnosis and potential  
15 gaps in the quality of apps regarding safety and privacy[2].

16  
17 There have been attempts to provide frameworks for evaluating the quality of mHealth apps. A systematic  
18 review identified 45 frameworks for evaluating mHealth apps, which varied according to the target users  
19 (e.g., developers, patients), specific conditions (e.g., diabetes, mental health, cancer, pain) and various  
20 elements of evaluation that are identified in the core domains for Health Technology Assessment  
21 framework (such as safety and effectiveness)[11]. Other frameworks have promoted a more holistic  
22 approach by encompassing privacy and security, the evidence base, ease of use, and data integration[12]  
23 or ethical principles related to using health apps in health psychology[13]. Reviews have also identified  
24 existing methods for assessing mHealth app quality[14], as well as guidelines for reporting evaluations of  
25 specific types of technology, such as sensors[15] and mHealth interventions, more broadly[16]. This  
26 includes the development of a CONSORT-EHEALTH checklist, an extension of the original CONSORT  
27 checklist for reporting randomised controlled trials (RCTs)[17]. This focuses on improving the reporting  
28 of evidence from research into the use and effectiveness of mHealth applications in research studies.

29  
30 The existing initiatives reflect a focus on the quality of research activity, whereby mHealth interventions  
31 are evaluated in research studies, and the results of those studies are reported[18]. The process of  
32 systematically reviewing published studies then provides an overview of the evidence base for the use and  
33 effectiveness of different types of mHealth interventions for different patient populations and various  
34 purposes. However, guidance is missing on how to systematically review commercially developed  
35 mHealth apps (i.e., the software products available to download from app stores), which are often not  
36 derived from research or subject to evaluation in research studies.

37  
38 The process of searching, screening, extracting and analysing data, and critically appraising mHealth apps  
39 available via commercial platforms can differ from traditional approaches to reviewing published research  
40 studies of health apps. A key difference between a systematic literature review and a systematic health  
41 app review is the items evaluated. In a systematic review, reviewers attempt to identify evidence from  
42 research studies from peer-reviewed journals or grey literature to evaluate the effectiveness (RCT  
43 evidence) or other characteristics that influence the effectiveness, uptake, and engagement with digital



1 health interventions. As we have outlined, several existing systematic reviews of mHealth applications do  
2 this. In a systematic health app review, we focus on providing a transparent and replicable evaluation of  
3 the functionality, quality and purpose of mHealth apps for particular user groups or health conditions. A  
4 systematic health app review is informed by the principles and process of more traditional systematic  
5 reviews, in terms of approaches to searching, use of inclusion/exclusion criteria, and explicit assessment  
6 measures of quality. However, how these are operationalised is methodologically different and is the  
7 focus of this paper. By building on our research team's experiences of conducting and publishing various  
8 reviews of commercially available mHealth apps, we provide an overview of the methodological  
9 considerations, aiming to systematise the process and support high-quality reviews of mHealth apps. In  
10 doing so, we outline the 7-step process for conducting systematic health app reviews.

## 11 12 **METHODS**

13  
14 In this paper, we use examples from our previous work as case studies, supported by work from other  
15 authors to develop a new framework for conducting a review of commercially available health apps. We  
16 combine our experience (see Table 1) with the results of a hand search of the top medical informatics  
17 journals (i.e., The Lancet Digital Health, npj Digital Medicine, Journal of Biomedical Informatics, and the  
18 Journal of the American Medical Informatics Association) over the last five years (2018-2022) to identify  
19 other reviews of commercial health apps to contribute to the discussion of this methodological approach.  
20 Based on this we propose methods for writing the research question and aim, determining the eligibility  
21 criteria, and carrying out the review and highlight and discuss the methodological issues raised at each  
22 stage.

23  
24 The reviews we draw on cover a range of apps and provide examples of a number of the decisions and  
25 challenges in conducting such reviews. Two of our reviews informed wider research studies; a review of  
26 apps used to support hand hygiene to provide the focus for a subsequent research evaluation[19], and a  
27 review of patient-facing genetics apps to inform the design and development of a genetic counselling  
28 app[20]. Our other app reviews have provided evidence alongside a more traditional systematic review of  
29 the published research literature or as an independent review to guide clinicians/patients about mHealth  
30 apps they could use to support patient care.

31  
32 As the app review process follows much of the same steps as conducting systematic literature reviews, we  
33 also drew on some existing guidance to formulate the 7 steps. This included the work by Khan et al.[21]  
34 who name five steps for conducting systematic literature reviews: 1) framing the question, 2) identifying  
35 relevant publications, 3) assessing the quality of studies, 4) summarising the evidence and 5) interpreting  
36 the findings. Xiao and Watson[22] name similar steps to conducting reviews but added steps for  
37 developing and validating the review protocol, screening for inclusion, extracting data and reporting the  
38 findings.

39  
40  
41 **Table 1.** Summary of our app reviews, which are used as cases to inform the methods for conducting  
42 systematic app reviews.

| First author(s); date published      | Aim                                                                                                                                                                                                                                | Purpose of review                                                                      | Number of apps reviewed |
|--------------------------------------|------------------------------------------------------------------------------------------------------------------------------------------------------------------------------------------------------------------------------------|----------------------------------------------------------------------------------------|-------------------------|
| Paripoorani; in-progress[23]         | To explore and identify menopause apps available in the UK, assess their quality, functions, and content, and determine whether and to what extent they focus on menopause-related osteoporosis.                                   | Standalone app review.                                                                 | 28                      |
| Vercell et al., 2022[24]             | To identify patient-facing cancer apps which can record patient reported outcomes, and to explore their purpose, functionality, quality, and ability to integrate with electronic health records.                                  | Standalone app review.                                                                 | 12                      |
| Gasteiger & Vercell et al., 2022[20] | To identify patient-facing smartphone apps related to genetic or genomic conditions available in the UK and explore their purpose, functions, and quality.                                                                         | Inform the design of a genetics app which is being co-designed with community members. | 22                      |
| Gasteiger et al., 2021[19]           | To identify smartphone apps that support hand hygiene practice and to assess their content, technical and functional features, and quality. A secondary objective was to make design and research recommendations for future apps. | Background of wider project on extended reality hand hygiene training.                 | 90                      |
| Ali et al., 2021[25]                 | To explore the current state of smartphone-based pain manikins and to formulate recommendations to guide their development in the future.                                                                                          | To formulate recommendations to guide the development of pain manikins in the future.  | 28                      |
| Pearsons et al., 2021[26]            | To identify commercially available atrial fibrillation self-management apps, analyse, and synthesise their characteristics, functions, privacy/security, behaviour change techniques, quality and usability.                       | To inform the development and testing of a new app for atrial fibrillation.            | 5                       |
| McGarrigle et al., 2020[27]          | To identify existing apps and websites to support independent engagement in strength and balance exercises by older people, and to evaluate evidence for effectiveness, quality, and use of behaviour change techniques.           | To provide evidence-based alternatives to face-to-face exercise classes.               | 13                      |

## RESULTS

1  
2  
3 1 Through discussion within the research team and drawing on our experiences of conducting app reviews  
4 2 and through cross-checking with app reviews by other author teams, we have outlined seven steps to  
5 3 support rigour in conducting reviews of health apps available on the app market. The steps are: 1) writing  
6 4 a research question or aim, 2) conducting scoping searches and developing the protocol, 3) determining  
7 5 the eligibility criteria using the TECH framework, 4) conducting the final search and screening of health  
8 6 apps, 5) data extraction, 6) quality, functionality, and other assessments and 7) analysis and synthesis of  
9 7 findings. Each step is discussed in turn.  
10  
11  
12 8

### 13 9 **Step 1. Writing a research question (or aims)**

14 10  
15 11 The focus of an app review will influence the development of the research questions or aims and  
16 12 underpinning approach to evaluating health apps. If the purpose is to produce a standalone review to  
17 13 support future research and innovation in a specific health domain, understanding existing gaps can help  
18 14 formulate a more general research question. However, if the review is the starting point of a programme  
19 15 of research that aims to design, develop, and evaluate a new health app with a population of patients,  
20 16 carers, health professionals, or the public then the research questions may be more focused to examine  
21 17 aspects of apps such as their quality, functionality or availability. Formulating an answerable review  
22 18 question is essential for systematic literature reviews. While formulating a review question helps guide all  
23 19 stages of a systematic literature review (e.g., searching, screening, extracting, and synthesising), not every  
24 20 question format applies to systematic app reviews. For example, the PICO format is appropriate for  
25 21 systematic literature reviews looking at the effectiveness of interventions in a target population. However,  
26 22 in systematic health app reviews, reviewers can only access the results of effectiveness or evaluation  
27 23 studies (if conducted) if they are published. A bespoke alternative is required, just as with systematic  
28 24 qualitative reviews where SPIDER is used.  
29  
30  
31  
32 25

33 26 Therefore, we propose the acronym ‘TECH,’ which represents; 1) Target user, 2) Evaluation focus, 3)  
34 27 Connectedness, and 4) Health domain, as a mechanism to develop a focused research question to guide a  
35 28 health app review. TECH was designed through discussion by the research team and by mapping key  
36 29 concepts against existing frameworks (e.g., SPIDER and PICO). Figure 1 presents the acronym, questions  
37 30 which researchers may consider (and the similarity to other acronyms) and a worked example for one of  
38 31 our reviews which aimed to identify commercially available atrial fibrillation self-management apps,  
39 32 analyse, and synthesise characteristics, functions, privacy/security, incorporated behaviour change  
40 33 techniques and quality and usability[26]. TECH is designed to capture the nuances of health domains,  
41 34 supporting the development of clear, answerable research questions. It is important to note that  
42 35 connectedness refers to connecting with other devices or applications and existing human-driven digital  
43 36 or other services—such as a health app for booking appointments with therapists.  
44  
45  
46  
47 37

### 48 38 **Step 2. Conducting scoping searches and developing the protocol**

49 39  
50 40 A preliminary (scoping) search of the health app market via the Apple, Google, and Microsoft app stores  
51 41 is an essential first step to help determine whether the number of commercial health apps available is  
52 42 feasible to review. It is worth noting that the language used in descriptions of commercial mHealth apps  
53 43 can vary widely and differ from the scientific language used in published research studies. Hence, a broad  
54 44 search using a range of terminology should be employed initially to avoid missing relevant health apps.  
55  
56  
57  
58  
59  
60

1  
2  
3 1 We recommend that researchers use basic keywords focussed on the health domain/topic (see Figure 1) as  
4 2 the search function within app stores is limited. For example, for our hand hygiene app review we only  
5 3 used two keywords: hand hygiene and hand washing[19]. In our cancer app review[24], we used more  
6 4 keywords, but all were related to the health domain and only one focussed on the target user (patients):  
7 5 cancer, cancer patient, cancer treatment, cancer management and cancer side effects.  
8 6

9 7  
10 7 If too few health apps are returned, this might allow for broadening the scope of the topic or adding more  
11 8 keywords, while too many apps will likely require the scope and language used to be narrowed. This  
12 9 means that the research question and the eligibility criteria may need to be refined iteratively, with  
13 10 multiple scoping searches performed until a reasonable number of apps are identified. The number of  
14 11 potential apps that may be included in the review can be counted by reading the app's name and  
15 12 description and judging its relevance to the topic.  
16 13

17 14  
18 14 To give an indication of how many apps is reasonable to review, we previously identified 236[23],  
19 15 405[24], 555[26], 668[19], 754[20] and 3938[25] health apps from initial searches, before screening or  
20 16 deduplication took place. One of our reviews identified 7561 apps before screening[27] due to the topic  
21 17 (exercise), for which many apps exist. Following the initial screening of app titles and app store  
22 18 descriptions, this number was significantly reduced, and only 13 were included in the review. However,  
23 19 each research team should decide what number is appropriate by considering resources (e.g., time,  
24 20 budget, and the number of reviewers available) and the topic of interest.  
25 21

26 22  
27 22 Scoping searches can also help to identify important considerations for refining the inclusion and  
28 23 exclusion criteria. For example, in our review of hand hygiene apps[19], we initially intended to target  
29 24 healthcare providers as the population of interest. However, the scoping search highlighted that few apps  
30 25 specified their intended users. We, therefore, removed healthcare providers as the intended audience from  
31 26 the inclusion criteria and replaced this with adults more generally.  
32 27

33 28  
34 28 It is important to note that the scoping search should be conducted when the team is almost ready to begin  
35 29 the final searches, as health apps can disappear and emerge quickly from app stores. This means that the  
36 30 numbers determined from the scoping searches will likely differ from the number of apps identified in the  
37 31 final search. Longer periods between the scoping and final search will result in more substantial  
38 32 differences in the number of apps available.  
39 33

40 34  
41 34 In addition to scoping searches in the app stores, we recommend conducting initial searches in databases  
42 35 (e.g., MEDLINE and SCOPUS) and protocol registration databases to identify whether similar app  
43 36 reviews have been published or are underway. We also strongly recommend that researchers  
44 37 prospectively develop a protocol to guide their methods. Unlike systematic reviews which should usually  
45 38 be registered on PROSPERO (<https://www.crd.york.ac.uk/prospero/>) or OSF (<https://osf.io/>), there have  
46 39 not been any formal requirements to publish protocols of systematic health app reviews. However, we  
47 40 recommend that future protocols for commercial health app checks be published (in advance of the  
48 41 searches) on OSF to reduce the likelihood that the review is unnecessarily duplicated and ensure greater  
49 42 research transparency. This is becoming accepted practice for other reviews (e.g., scoping reviews) for  
50 43 which PROSPERO registration is currently not possible[28].  
51 44  
52  
53  
54  
55  
56  
57  
58  
59  
60

### Step 3. Determining the eligibility criteria using the TECH framework

Inclusion and exclusion criteria should be carefully defined using the information obtained in the scoping searches. Frameworks such as PICO or SPIDER may help develop eligibility criteria for a review so that characteristics such as the population/sample, type of intervention or phenomenon of interest, and outcomes related to mHealth apps are considered[29]. However, we propose using a more focused framework for health app reviews to support the nuances of undertaking this type of systematic review, as the aim is not to examine the effectiveness of apps or to synthesise the findings of qualitative studies on health apps. As described above, the ‘TECH’ acronym considers the Target user, Evaluation focus, Connectedness, and Health domain (see Figure 1 for the worked example). Well-thought-out eligibility criteria using the TECH framework may support the development of an appropriate search strategy considering four aspects of commercial health apps, which can lead to a systematic and unbiased selection of appropriate apps. Additionally, reviewers should consider searching the literature to identify published and relevant app reviews to refine the eligibility criteria further.

A health app may be characterised by its intended use and target audience. Therefore, we suggest separating the eligibility criteria into two components: app characteristics (evaluation focus, connectedness, health domain) and target audience characteristics (e.g., age, gender, race/ethnicity, geographic location). App characteristics are likely to include the type of health intervention or health prevention method, such as self-management, that can be captured under the ‘Evaluation focus’, along with the target disease, problem or focus of the health app, which falls under the ‘Health domain’. It may be helpful to state whether the health condition is specific or if it covers a broad category of health-related issues. Some health apps can link to other software applications, connect to hardware devices (e.g., wearable technologies), or rely on additional external devices (e.g., virtual reality headsets or smartwatches) to function correctly, which should be captured under the ‘Connectedness’ criteria. The target audience characteristics will likely include the population type, including patients, healthcare professionals, healthcare students, carers, the public, or particular organisations. Audience characteristics may also include age ranges or if the app is aimed at children or adults; whether the app is aimed at individuals or groups; whether it is assumed that users will pay to access the app (or content within it) and whether the app is available in certain languages or locations.

### Step 4. Conducting the final search and screening of health apps

Once the scoping searches are complete and the search terms have been collated, the final search can be run on the main app stores (i.e., Apple, Google Play, and Microsoft) to identify potentially relevant health apps. Several third-party app stores or repositories are also available for Android-based apps (e.g., Amazon Appstore, F-Droid, and Samsung Galaxy Apps), some of which are open source making the download process easier. The volume of app stores that can be searched will depend on the time and resources available to the review team. Other approaches include using a proprietary software database which enables searching for mobile health apps across iOS and Google Play app stores[30] or publicly available online rating frameworks for health apps that use expert reviewers[31] such as the Organization for the Review and Care of Health Apps (ORCHA, <https://orchahealth.com/>), the PsyberGuide by One Mind (<https://onemindpsyberguide.org/>), and MindTools. This approach could be combined with



1 independent searching and evaluating of commercial mHealth apps to ensure an exhaustive assessment is  
2 conducted.

3  
4  
5  
6  
7 4 In contrast to established bibliographical research databases such as MEDLINE or PubMed, which enable  
8 5 complex searches (e.g., use of Boolean operators and filtering options), the search function within app  
9 6 stores is limited. Basic filters may exclude apps that cost or only include child-friendly apps. Some stores  
10 7 (e.g., the Google Play store) also enable for users to identify family-friendly apps and distinguish the type  
11 8 of app being searched (i.e., phone, tablet, TV, Chromebook, watch or car). The Apple app store also has  
12 9 basic filters for the price (any or free), category (including health and fitness) and sorting (relevance,  
13 10 popularity, ratings or release date). Other factors app stores use may also affect search results (e.g., app  
14 11 rating or use of adverts). To overcome this, searching across multiple app stores is advisable.

15  
16  
17  
18 13 The search on an app store results in a list of available apps and their descriptions. Unlike research  
19 14 literature databases, there are no options to export the results in a useful format (e.g., RIS) for uploading  
20 15 to specialised screening and data management software (e.g., Covidence[32] or Rayyan[33]). Hence, the  
21 16 research team must review each app on the results page of each app store to determine if it meets the  
22 17 inclusion criteria for the review. Like systematic literature reviews, using two or more researchers to  
23 18 reach a consensus on eligibility from the review enhances rigour and study quality. Screening should  
24 19 ideally be conducted on the same day to avoid differences in search results on the different app stores,  
25 20 which can vary day-to-day and across countries. A workaround can be to log the app name, version  
26 21 number and link to the webpage on the app store hosting each app to capture the search results and ensure  
27 22 these are used consistently by the review team.

28  
29  
30  
31 24 The second screening stage involves downloading all apps deemed to have met the inclusion criteria,  
32 25 requiring at least one Android and one iPhone smartphone between the review team. Strategies for this  
33 26 can include having separate researchers download apps using different devices or sharing one device  
34 27 between reviewers. Some health apps also require user accounts to be set up and verified before allowing  
35 28 access to their full functionality, which may be required to assess eligibility. In one of our reviews, we  
36 29 approached app developers for full app access, finding that they were more than happy to allow this[27].  
37 30 Additional researchers can be consulted to resolve differences during the second screening phase. Finally,  
38 31 modifying a PRISMA flow diagram[34] can provide a transparent overview of the search and screening  
39 32 process. This also requires clearly stating the number of duplicates across the searches in addition to how  
40 33 many apps were excluded at each screening stage, with the reasons outlined at the second stage.

#### 41 34 42 35 **Step 5. Data extraction**

43  
44  
45  
46  
47 37 Like systematic literature reviews, the data extraction process in app reviews requires identifying relevant  
48 38 information from the eligible apps. Data is extracted into a predefined data extraction (coding) sheet by  
49 39 using the app. The length of use to extract the information depends on the types of apps, number of data  
50 40 extraction items and the focus of the review. For example, some apps will take longer to review as they  
51 41 may require more comprehensive information to be extracted, users to register personal profiles or to send  
52 42 push notifications at specific times of the day (e.g., for behaviour change apps).



1  
2  
3 1 A range of data extraction items may be used. Henson et al.[12] developed a five-level framework for  
4 2 evaluating health apps, concluding that background information, privacy and security, evidence, ease of  
5 3 use and data integration are vital components to consider. Across our previous work, we have categorised  
6 4 the items as descriptive information, technical information, and content (see Table 2). We have included  
7 5 additional items regarding gamification principles and tactics used in an app review by Rajani et al.[35]  
8 6 and levels of personalisation, security and privacy, which Parmar et al.[30] proposed. Other approaches  
9 7 used in one of our reviews[26] include extracting information on the Online Trust Alliance Best Practices  
10 8 Privacy Recommendations[36]. This considers four elements: 1) basic notice/disclosure, 2) key  
11 9 compliance policies, 3) protected privacy and protected sharing criteria, and 4) miscellaneous privacy  
12 10 elements. Lastly, our osteoporosis app review considered ratings by the Organisation for the Review of  
13 11 Care and Health Apps (ORCHA) (<https://orchahealth.com/>). ORCHA objectively reviews health apps,  
14 12 giving scores for three domains (data privacy, professional assurance, and usability/accessibility) and an  
15 13 overall score (%). Scores below 65% imply the presence of some issues, and below 45% indicates  
16 14 considerable issues.  
17 15  
18 16  
19 17  
20 18  
21 19  
22 20  
23 21  
24 22  
25 23  
26 24  
27 25  
28 26  
29 27  
30 28  
31 29  
32 30  
33 31  
34 32  
35 33  
36 34  
37 35  
38 36  
39 37  
40 38  
41 39  
42 40  
43 41  
44 42  
45 43  
46  
47  
48  
49  
50  
51  
52  
53  
54  
55  
56  
57  
58  
59  
60

1 **Table 2.** Example of data extraction items for a commercial health app review.

| Items                                                                                  | Description                                                                                                                                                                                                                                                                                                                                                                                                                                                                    |
|----------------------------------------------------------------------------------------|--------------------------------------------------------------------------------------------------------------------------------------------------------------------------------------------------------------------------------------------------------------------------------------------------------------------------------------------------------------------------------------------------------------------------------------------------------------------------------|
| Descriptive information                                                                |                                                                                                                                                                                                                                                                                                                                                                                                                                                                                |
| App name                                                                               | Name of the mobile app                                                                                                                                                                                                                                                                                                                                                                                                                                                         |
| Version number                                                                         | Version of the app reviewed                                                                                                                                                                                                                                                                                                                                                                                                                                                    |
| Developer                                                                              | Name of the developer                                                                                                                                                                                                                                                                                                                                                                                                                                                          |
| Market/s available                                                                     | Name of the markets where the app is available                                                                                                                                                                                                                                                                                                                                                                                                                                 |
| Cost                                                                                   | Select which apply: free to download, cost to download (in GBP); in-app purchases available                                                                                                                                                                                                                                                                                                                                                                                    |
| Affiliated with a professional medical/health association, charity, or government body | No; Yes (name of organisation)                                                                                                                                                                                                                                                                                                                                                                                                                                                 |
| Average user rating from app markets                                                   | Not rated; Average number of public ratings (maximum 5 points)                                                                                                                                                                                                                                                                                                                                                                                                                 |
| Number of user ratings                                                                 | Total number of user ratings on app markets                                                                                                                                                                                                                                                                                                                                                                                                                                    |
| Technical information                                                                  |                                                                                                                                                                                                                                                                                                                                                                                                                                                                                |
| Privacy strategy                                                                       | Select which apply: Privacy policy, login, password, two-factor authentication, compliance with data protection acts (e.g., HIPAA or GDPR), no privacy strategy                                                                                                                                                                                                                                                                                                                |
| Security                                                                               | Select which apply: email verification, text verification, social media verification, no strategy                                                                                                                                                                                                                                                                                                                                                                              |
| Third-party authorizations (e.g., data sharing)                                        | Yes; No                                                                                                                                                                                                                                                                                                                                                                                                                                                                        |
| Works offline                                                                          | Yes; No                                                                                                                                                                                                                                                                                                                                                                                                                                                                        |
| Works in the background                                                                | Yes; No                                                                                                                                                                                                                                                                                                                                                                                                                                                                        |
| Asks to enable push notifications                                                      | Yes; No                                                                                                                                                                                                                                                                                                                                                                                                                                                                        |
| Content                                                                                |                                                                                                                                                                                                                                                                                                                                                                                                                                                                                |
| Purpose                                                                                | <ul style="list-style-type: none"> <li>• Diagnose, record data/track, educate/inform, instruct, remind, analyse (i.e., DNA sample/test data)<sup>A</sup></li> <li>• Remind, track, record data, educate/instruct, inform, convince, provide feedback<sup>B</sup></li> <li>• Educational; risk assessor; tracking<sup>C</sup></li> <li>• Diagnose, record data/track, educate/inform, instruct, remind, analyse<sup>D</sup></li> <li>• Educate, instruct<sup>E</sup></li> </ul> |

| Description                                                                                  | Summary of the app's content                                                                                                                                                                                                                                                                                                                                                                                                                                                                                                                                                                                                         |
|----------------------------------------------------------------------------------------------|--------------------------------------------------------------------------------------------------------------------------------------------------------------------------------------------------------------------------------------------------------------------------------------------------------------------------------------------------------------------------------------------------------------------------------------------------------------------------------------------------------------------------------------------------------------------------------------------------------------------------------------|
| **Behaviour change techniques used <sup>B</sup>                                              | <ul style="list-style-type: none"> <li>• Select which apply: self-monitoring, feedback, goal-setting and action-planning, social support, reward/threat, prompt practice</li> <li>• Make a note of applicable BCTs using Michie's 93 item BCT taxonomy as a guide[37]<sup>E</sup></li> </ul>                                                                                                                                                                                                                                                                                                                                         |
| Best practice guidelines mentioned <sup>B</sup><br>Scientific studies mentioned <sup>E</sup> | No; Yes (name, e.g., WHO 5 moments for hand hygiene)<br>No; Yes (which, what claims are made)                                                                                                                                                                                                                                                                                                                                                                                                                                                                                                                                        |
| Comprehensiveness of the content <sup>B</sup>                                                | Select which criteria were met (from predetermined criteria)                                                                                                                                                                                                                                                                                                                                                                                                                                                                                                                                                                         |
| Innovative / personalisation features used <sup>B, E</sup>                                   | <ul style="list-style-type: none"> <li>• Select which apply: personal profile, tracking/reminders, virtual reality, augmented reality*, app-based community, gamification, chatbots (avatars/characters, competition, levels, scores, marketplace/coins, rules, collaboration/teamwork).</li> <li>• Summary of the features</li> </ul>                                                                                                                                                                                                                                                                                               |
| Gamification techniques                                                                      | <ul style="list-style-type: none"> <li>• Principles used (select which apply): goal-setting, capacity to overcome challenges (e.g., growth or learning), feedback on performance, reinforcement, compare progress (e.g., monitoring), social connectivity, fun and playfulness (e.g., alternative reality), no gamification principles used</li> <li>• Tactics used (select which apply): providing clear goals, offering a challenge, levels or incremental challenges, allocating points, showing progress, providing feedback, rewards, badges for achievements, showing game leaders (e.g., leaderboard), story/theme</li> </ul> |
| Levels of personalisation                                                                    | <ul style="list-style-type: none"> <li>• Select which apply: implicit personalisation (information needed for personalisation was obtained by the system), explicit personalisation (information required active use/engagement), no personalisation</li> <li>• Type of personalisation (select which apply): individuated (targets an individual user), categorical (targets groups)</li> <li>• Aspects of personalisation (select which apply): content, user interface (the manner in which information is presented), delivery channel (the media through which information is delivered), functionality</li> </ul>              |
| Data can be integrated into electronic health record <sup>D</sup>                            | No; Yes                                                                                                                                                                                                                                                                                                                                                                                                                                                                                                                                                                                                                              |
| Readability                                                                                  | Flesch Reading Ease: Scored 0-100; Flesch-Kincaid Grade Level: corresponds with USA education grades level                                                                                                                                                                                                                                                                                                                                                                                                                                                                                                                           |
| ORCHA ratings <sup>C</sup>                                                                   | Reviewed by ORCHA: yes; no. If rated, scores for 3 domains (%): Data privacy, professional assurance and usability/accessibility; overall score: %                                                                                                                                                                                                                                                                                                                                                                                                                                                                                   |

1 **Notes:**

2 <sup>A</sup> Item used for the genetic app review

<sup>B</sup> Item used for hand hygiene app review

3 <sup>C</sup> Item used for the osteoporosis app review

<sup>D</sup> Item used for the oncology app review

4 <sup>E</sup> Item used for strength and balance exercises for older adults app review

5 \* Some apps require additional devices such as headsets and may not be appropriate to be included in a general app review

1  
2  
3 1 We encourage researchers to develop their own data extraction items relevant to their topics of interest.  
4 2 For example, in our hand hygiene app review and like other app reviews[38, 39], we developed criteria to  
5 3 assess the comprehensiveness of the content by identifying themes across reputable sources and  
6 4 guidelines on hand hygiene. Other examples include extracting information about health app security and  
7 5 privacy, including HIPPA or COPPA compliance, whether a medical disclaimer was provided, encrypted  
8 6 data disclaimer, and user verification strategies during login[30].  
9 7

10 8 We also note that sometimes the information sought is not readily available or transparently reported  
11 9 within apps. In this case, researchers should note where information is missing, using acronyms like N/R  
12 10 (not reported) or N/A (not available). This can also be an interesting finding and an opportunity for apps  
13 11 to be improved. For example, excluding information about data sharing may be concerning for health  
14 12 apps that collect and record personal medical information.  
15 13

16 14 Readability metrics can also help determine how appropriate the language used in each app is.  
17 15 Researchers can determine readability by copying a paragraph into a Microsoft Word document and using  
18 16 two Flesch-Kincaid metrics that are built into the word processing software[40, 41]. The Flesch-Kincaid  
19 17 Reading Ease score ranges from 0 to 100, with higher scores indicating that the material is easier to  
20 18 read[40]. The Flesch-Kincaid Grade Level gives a score that refers to the equivalent grade level of  
21 19 education in the USA[41]. For example, a score of 12 indicates that a twelfth grader (aged 17 or 18) in the  
22 20 USA should be able to understand the content.  
23 21

## 24 22 **Step 6. Quality, functionality, and other assessments**

### 25 23 *Quality*

26 24 Evaluating the quality of apps requires a different approach to using critical appraisal tools or risk of bias  
27 25 measures commonly used in systematic literature reviews. Quality can be assessed using the Mobile App  
28 26 Rating Scale (MARS), which comprises 19 items across four objective scales (engagement, functionality,  
29 27 aesthetics, and information quality) and an additional 4-item subjective quality scale[42]. Each item is  
30 28 rated on a 5-point Likert scale: (1) inadequate, (2) poor, (3) acceptable, (4) good, and (5) excellent.  
31 29 MARS has been translated into several languages, including French, Spanish, German and Italian[43-46]  
32 30 and is suitable for assessing mobile apps for health conditions due to its reliability, validity and  
33 31 objectivity[47]. In all but two of the app reviews we have conducted to date, we have excluded the  
34 32 subjective quality scale to ensure that assessments are as objective as possible. Nevertheless, Stoyanov  
35 33 et al.[42] reported that the objective measures correlated well with the subjective measures. A step-by-step  
36 34 training video on the use of the MARS is available on YouTube[48].  
37 35

38 36 The MARS question ‘Has the app been trialled/tested?’ can be answered by searching for literature on  
39 37 evaluation (e.g., usability, satisfaction or effectiveness) and using more traditional methods, such as risk  
40 38 of bias, to evaluate the quality of the evidence[49]. However, some review teams may wish to take this a  
41 39 step further if the review aims to recommend evidence-based apps to their target population. For example,  
42 40 in our review on strength and balance exercises for older adults[27], we also visited the app/developer  
43 41 websites and contacted the developers directly for information on any evaluations that had taken place  
44 42 concerning the effectiveness of the apps in preventing falls. Due to the absence of evaluations, we  
45 43  
46 44  
47 45  
48 46  
49 47  
50 48  
51 49  
52 50  
53 51  
54 52  
55 53  
56 54  
57 55  
58 56  
59 57  
60 58

1 compared the interventions promoted by the app with those used in known “gold standard” strength and  
2 balance programmes to determine if they had an evidence base.

3  
4  
5  
6  
7  
8  
9  
10  
11  
12  
13  
14  
15  
16  
17  
18  
19  
20  
21  
22  
23  
24  
25  
26  
27  
28  
29  
30  
31  
32  
33  
34  
35  
36  
37  
38  
39  
40  
41  
42  
43  
44  
45  
46  
47  
48  
49  
50  
51  
52  
53  
54  
55  
56  
57  
58  
59  
60

4 Researchers may also build on the MARS items to assess the quality of each app in more detail. In one of  
5 our reviews, we added predetermined criteria to further evaluate the current state of development of apps  
6 for pain assessment and to provide future directions to developers[25]. For example, for the item about  
7 customisation, we looked at whether the app provides a setting tool allowing users to change the interface  
8 to suit them best. For the interactivity item, we also extracted data on the manikin regarding dimension  
9 (2-dimensional or 3-dimensional), orientation (left/right) and gender (male, female or neutral). It is  
10 important to note that directly amending the MARS may impact the validity of the tool. However,  
11 additional relevant items can further explore the dimensions.

### 12 **Functionality**

15 We recommend using the IMS Institute for Healthcare Informatics functionality score to assess the  
16 functionality of apps[50]. This records the availability of 11 different functions within an app, rated 1 if  
17 they are present and 0 if otherwise (see Table 3). It complements the MARS functionality score, which  
18 measures the quality of performance, ease of use, navigation and design of an app using rating scales. The  
19 IMS functionality score is calculated from seven main criteria (inform, instruct, record, display, guide,  
20 remind or alert and communicate) and four subcategories under the ‘record’ item (collect, share, evaluate,  
21 intervene). An overall functionality score, between 0 and 11 for the full scale, is calculated by summing  
22 the scores across the individual items. The IMS scale may be tailored to ensure relevance for a specific  
23 review; for instance, in our review of handwashing, we omitted the ‘evaluate data’ criteria because it was  
24 irrelevant to the review topic[19].

27 **Table 3.** IMS Institute for Healthcare Informatics functionality score items and descriptions.

| Items             | Description                                                                                                      |
|-------------------|------------------------------------------------------------------------------------------------------------------|
| 1. Inform         | Provides information in a variety of formats e.g., text, photo, video.                                           |
| 2. Instruct       | Provides instructions to the user.                                                                               |
| 3. Record         | Captures user-entered data.                                                                                      |
| 3.1 Collect data  | Able to enter and store health data on individual phone.                                                         |
| 3.2 Share data    | Able to transmit health data.                                                                                    |
| 3.3 Evaluate data | Able to evaluate the entered data by patient and provider, provider and administrator, or patient and caregiver. |
| 3.4 Intervene     | Able to send alerts based on the data collected or propose behavioural intervention or changes.                  |
| 4. Display        | Graphically display user-entered data/output user-entered data.                                                  |

|                    |                                                                                                                                                                        |
|--------------------|------------------------------------------------------------------------------------------------------------------------------------------------------------------------|
| 5. Guide           | Provide guidance based on user-entered information, and may further offer further help e.g., diagnosis, recommend consultation with a doctor or a course of treatment. |
| 6. Remind or alert | Provide reminders to the user.                                                                                                                                         |
| 7. Communicate     | Provide communication between users, consumers or others and/or provide links to social networks.                                                                      |

Written results from the IMS scale are generally supported with visual representations, such as radar graphs/charts, which map variables onto axes protruding from a central point (see Figure 2). Each axis can represent a different item of the IMS, with values plotted onto each axis. These types of data visualisations could be helpful for clinicians, patients, developers and other stakeholders so they can quickly see which health apps are ranked high or low across a range of evaluation metrics to inform decision-making about which, if any, to use.

### ***Other assessments***

Other ways to evaluate health apps include examining the user reviews of each app on the app stores. Plante et al.[51] took this approach when reviewing blood pressure measuring smartphone apps by downloading the ratings and reviews from the iTunes store and developing a series of narrative themes linked to the high and low-rated apps. Some themes associated with high user ratings included accuracy, login functionality, convenience, and successful measurement. In contrast, lower-rated apps were associated with inaccuracy, inability to produce a successful reading, and refunds requested by users. A qualitative approach to understanding the experiences of a range of users can help inform the final evaluation of a range of apps.

Other rating tools include THESIS, developed by evaluating over 200 mHealth apps with a panel of experts[52]. THESIS encompasses six domains: 1) transparency, 2) health content, 3) technical content, 4) security/privacy, 5) usability, and 6) subjective rating, which considers other factors like software stability, interoperability, bandwidth, and application size. Additionally, health apps have been evaluated for their security features (e.g., app signing security, encryption schemes, malware presence, permissions, and secure communication adoption) along with users' subjective perceptions of app security[53]. However, this approach requires technical expertise to undertake static and dynamic analysis techniques that may be outside some research teams' scope.

Other reviews have also evaluated criteria such as ethical values and medical claims. This includes beneficence, non-maleficence, autonomy, justice, and legal obligation in COVID-19 mobile phone apps following the Systems Wide Analysis of mobile health-related Technologies provided in the NHS Digital Assessment Questionnaire[54] and the medical claims of mental health apps such as scientific language, technical expertise and lived experience perspectives[10].

### **Step 7. Analysis and synthesis of findings**



1  
2  
3 1 Data synthesis may be performed by generating descriptive statistics (sums, averages, standard  
4 2 deviations, and percentages) on relevant items or combining these with forms of qualitative synthesis.  
5 3 Previously, we identified the highest-scoring apps regarding functionality and quality, presenting these  
6 4 with a written description of their main features. Interrater reliability can be calculated for the binary IMS  
7 5 Institute for Healthcare Informatics functionality scores using Cohen's Kappa statistic[55] and an intra  
8 6 class correlation coefficient (ICC) can be used to calculate interrater reliability for the ordinal MARS  
9 7 scores[56]. The ICC is the most commonly used statistic for assessing interrater reliability for ordinal  
10 8 variables. We have typically used an absolute agreement 2-way mixed-effects, average-measures  
11 9 model[57], which assumes that the raters are fixed and that systematic differences between raters are  
12 10 relevant.  
13  
14  
15  
16  
17

### 12 **Patient and public involvement and engagement**

18  
19 14 None of the commercial health app reviews generated by our research team actively included patients or  
20 15 the public due to pragmatic reasons, including time, resources, and funding constraints. Additionally, we  
21 16 did not identify any health app review recently published in the top medical informatics journals that took  
22 17 this approach. However, patient and public involvement and engagement (PPIE) is viewed favourably by  
23 18 many funders, researchers, and policymakers as it can add value to health research and facilitates its  
24 19 dissemination and impact. As outlined above, all stages of a commercial app review could benefit from  
25 20 the perspectives of patients, carers, and members of the public towards the health apps being evaluated.  
26 21 As with traditional systematic reviews, they could assist with reviewing the protocol, searching,  
27 22 screening, extracting and analysing data[58] and co-production by undertaking quality, usability or other  
28 23 assessments and participating in various dissemination activities. PPIE could provide another valuable  
29 24 dimension to the process and enrich the results of a commercial health app review.  
30  
31  
32  
33

### 26 **Key differences between systematic literature reviews and systematic health app reviews**

34  
35  
36 28 Here, we summarise the main differences between a traditional approach to systematic reviewing  
37 29 literature versus undertaking a commercial health app review, as outlined in this methodological  
38 30 discussion (see Table 4).  
39  
40  
41  
42  
43  
44  
45  
46  
47  
48  
49  
50  
51  
52  
53  
54  
55  
56  
57  
58  
59  
60

**Table 4.** Summary of the review stages, contrasting systematic literature review methods with systematic health app review methods.

| Review stage           | Systematic literature review (of effectiveness) with a focus on quantitative reviews                                                                                                                                                                                                                                                                                                                                                                                                                      | Systematic commercial health app review                                                                                                                                                                                                                                                                                                                                                                                                                                                                                                                                                                         |
|------------------------|-----------------------------------------------------------------------------------------------------------------------------------------------------------------------------------------------------------------------------------------------------------------------------------------------------------------------------------------------------------------------------------------------------------------------------------------------------------------------------------------------------------|-----------------------------------------------------------------------------------------------------------------------------------------------------------------------------------------------------------------------------------------------------------------------------------------------------------------------------------------------------------------------------------------------------------------------------------------------------------------------------------------------------------------------------------------------------------------------------------------------------------------|
| Scoping work           | <ul style="list-style-type: none"> <li>Scoping searches of the literature are usually necessary to inform protocol development and ensure the review addresses appropriate questions.</li> <li>Sometimes used to ensure manageable size.</li> </ul>                                                                                                                                                                                                                                                       | <ul style="list-style-type: none"> <li>Scoping searches of some app stores is essential to determine whether the number of apps available are feasible to review.</li> <li>The research question and the eligibility criteria may be refined iteratively, with multiple scoping searches performed until a reasonable number of apps are identified.</li> </ul>                                                                                                                                                                                                                                                 |
| Protocol development   | <ul style="list-style-type: none"> <li>Journals increasingly require pre-registration of protocols.</li> <li>There are dedicated registries for many review types e.g., PROSPERO.</li> <li>Alternatives such as OSF sometimes used.</li> </ul>                                                                                                                                                                                                                                                            | <ul style="list-style-type: none"> <li>There is no formal requirement for protocols to be registered.</li> <li>Registration on OSF is appropriate and we recommend this.</li> </ul>                                                                                                                                                                                                                                                                                                                                                                                                                             |
| Stakeholder engagement | <ul style="list-style-type: none"> <li>Varies from none through protocol review to co-development or coproduction.</li> <li>This is recommended but not required unless a specific design is used, or it is a Cochrane review where consumer peer review is required.</li> </ul>                                                                                                                                                                                                                          | <ul style="list-style-type: none"> <li>Not formally required and most have had no stakeholder engagement.</li> <li>All stages could benefit from stakeholder engagement e.g., co-production by searching, screening, extracting and analysing data.</li> </ul>                                                                                                                                                                                                                                                                                                                                                  |
| Inclusion criteria     | <ul style="list-style-type: none"> <li>Most reviews include primary research studies.</li> <li>PICO usually used to define key eligibility criteria.</li> </ul>                                                                                                                                                                                                                                                                                                                                           | <ul style="list-style-type: none"> <li>The novel TECH framework can be used to help determine the eligibility criteria. TECH considers the Target user, Evaluation focus, Connectedness and Health domain.</li> </ul>                                                                                                                                                                                                                                                                                                                                                                                           |
| Search                 | <ul style="list-style-type: none"> <li>Searching multiple databases of published literature plus (often) trial registries and/or grey literature.</li> <li>Search strategy, dates and number of records reported for each database.</li> <li>Deduplication of search results may include using a reference manager.</li> <li>Citation searching also often used.</li> <li>There is extensive literature on multiple aspects of searching.</li> <li>Information specialists should be involved.</li> </ul> | <ul style="list-style-type: none"> <li>Searching the app market via multiple app stores using basic keywords.</li> <li>Additional sources may include a proprietary software database or publicly available online rating frameworks for health apps that use expert reviewers (e.g., ORCHA).</li> <li>The search information (e.g., app market, date of search and number of apps identified) is recorded on Excel.</li> <li>Deduplication of search results also often takes place on Excel.</li> <li>Information specialists are not generally involved, given that the search process is simple.</li> </ul> |
| Screening              | <ul style="list-style-type: none"> <li>Screening of search results exported from databases. Uses tools including Rayyan, Covidence, Endnote, EppiReviewer.</li> <li>Two stage process conducted in duplicate at each stage; disagreements resolved through consensus/ consulting third reviewer. Full text excludes listed with reasons or available on request.</li> <li>A PRISMA flowchart is used to visually report the literature search and screening process.</li> </ul>                           | <ul style="list-style-type: none"> <li>Screening of search results manually extracted into an Excel sheet.</li> <li>Two stage process in which stage 1 includes screening the apps title and description on the app store. Stage 2 includes downloading the app and assessing eligibility.</li> <li>Two reviewers are generally involved and a third may help to reach consensus on any disagreements. Studies excluded at stage 2 are listed with reasons for exclusion.</li> <li>The PRISMA flowchart is often amended and used to report the app search and screening process.</li> </ul>                    |

|                                                    |                       |                                                                                                                                                                                                                                                                                                                                                                                                                                                                                                                                  |                                                                                                                                                                                                                                                                                                                                                                                                                                                                                                                                                                                                                                |
|----------------------------------------------------|-----------------------|----------------------------------------------------------------------------------------------------------------------------------------------------------------------------------------------------------------------------------------------------------------------------------------------------------------------------------------------------------------------------------------------------------------------------------------------------------------------------------------------------------------------------------|--------------------------------------------------------------------------------------------------------------------------------------------------------------------------------------------------------------------------------------------------------------------------------------------------------------------------------------------------------------------------------------------------------------------------------------------------------------------------------------------------------------------------------------------------------------------------------------------------------------------------------|
| 1<br>2<br>3<br>4<br>5<br>6                         | Data extraction       | <ul style="list-style-type: none"> <li>Data are extracted into a prespecified and piloted form. Tools include Excel, Covidence, Revman, Eppi-Reviewer.</li> <li>Usually, data are extracted by one reviewer and checked by a second, sometimes duplicate extraction is used for some or all data.</li> </ul>                                                                                                                                                                                                                     | <ul style="list-style-type: none"> <li>Data are manually extracted into a prespecified form on Excel.</li> <li>Data may be extracted by one reviewer and checked by a second, or the task may be shared between reviewers.</li> </ul>                                                                                                                                                                                                                                                                                                                                                                                          |
| 7<br>8<br>9<br>10<br>11                            | Data management       | <ul style="list-style-type: none"> <li>Data may be transformed in various ways and processes may be implemented for the handling of missing data, such as assumption or imputation.</li> <li>There is extensive guidance on methodological approaches to challenges in data management.</li> </ul>                                                                                                                                                                                                                               | <ul style="list-style-type: none"> <li>Not generally relevant for commercial health app reviews.</li> <li>Researchers may contact developers for more information about any evaluations that have taken place.</li> </ul>                                                                                                                                                                                                                                                                                                                                                                                                      |
| 12<br>13<br>14<br>15<br>16<br>17<br>18<br>19<br>20 | Quality appraisal     | <ul style="list-style-type: none"> <li>A wide range of tools for assessment of risk of bias depending on study design and purpose; usually carried out in duplicate with disagreements resolved through consensus/consulting third reviewer.</li> <li>Recorded in Excel, Revman, EppiReviewer.</li> <li>Risk of bias plots can be generated on RevMan or RobVis.</li> <li>Increasingly, reviews will also use GRADE to rate the certainty of the evidence (from high to very low); GRADE assessment may use GradePRO.</li> </ul> | <ul style="list-style-type: none"> <li>Quality is generally assessed using the Mobile App Rating Scale (MARS) and recorded in Excel.</li> <li>Good practice requires each app to be reviewed independently by two raters.</li> <li>Inter-rater reliability is analysed and presented in the review.</li> </ul>                                                                                                                                                                                                                                                                                                                 |
| 21<br>22<br>23<br>24<br>25<br>26<br>27<br>28       | Synthesis             | <ul style="list-style-type: none"> <li>Meta-analysis may be conducted; Cochrane Handbook is usual source of methods guidance; an extensive literature exists on various aspects of this.</li> <li>Many reviews use narrative synthesis, which Cochrane offers guidance on, and there is recent guidance on SWiM (Synthesis without Meta-analysis).</li> </ul>                                                                                                                                                                    | <ul style="list-style-type: none"> <li>Data synthesis is generally performed descriptively by generating statistics (sums, averages, standard deviations, and percentages) on relevant items.</li> <li>The highest-scoring apps (regarding functionality and quality) are identified.</li> <li>Descriptive summaries may be written for text-based items (e.g., description of the main features).</li> <li>Interrater reliability can be calculated for the IMS Institute for Healthcare Informatics functionality scores using Cohen's Kappa statistic and an intraclass correlation coefficient for MARS scores.</li> </ul> |
| 29<br>30<br>31<br>32<br>33<br>34<br>35<br>36       | Data presentation     | <ul style="list-style-type: none"> <li>Meta-analyses (and sometimes non-pooled data) are presented using forest plots, often with risk of bias plots displayed alongside.</li> <li>Risk of bias results displayed using bespoke figures (see above); GRADE results typically displayed using Summary of Findings Tables.</li> </ul>                                                                                                                                                                                              | <ul style="list-style-type: none"> <li>Data tends to be presented as descriptive summaries and Tables. Bespoke figures can also be created.</li> <li>Data pertaining to the IMS Institute for Healthcare Informatics functionality score is often presented as a radar graph/chart.</li> <li>Inter-rater reliability statistics are presented for both the MARS quality appraisals and the IMS Institute for Healthcare Informatics functionality scores.</li> </ul>                                                                                                                                                           |
| 37<br>38<br>39<br>40<br>41                         | Updating and currency | <ul style="list-style-type: none"> <li>Reviews should generally have a search date within the last 12 months at submission for publication. Searches can be updated by re-running searches with the relevant date limit: new records will be identified but old one will not be lost (the process is additive) (an exception may be the grey literature).</li> </ul>                                                                                                                                                             | <ul style="list-style-type: none"> <li>Apps emerge, are updated, and disappear very quickly, so app reviews should be conducted and published as promptly as possible.</li> <li>New or updated searches in app stores will likely yield very different results, so updating a review is difficult.</li> </ul>                                                                                                                                                                                                                                                                                                                  |
| 42                                                 | Reporting             | <ul style="list-style-type: none"> <li>PRISMA checklist</li> </ul>                                                                                                                                                                                                                                                                                                                                                                                                                                                               | <ul style="list-style-type: none"> <li>No formal reporting guidelines for health app reviews.</li> </ul>                                                                                                                                                                                                                                                                                                                                                                                                                                                                                                                       |
| 43<br>44<br>45<br>46<br>47                         | Guidance              | <ul style="list-style-type: none"> <li>Cochrane Handbook and other guidance for specific reviews.</li> </ul>                                                                                                                                                                                                                                                                                                                                                                                                                     | <ul style="list-style-type: none"> <li>A YouTube video shows how to use the MARS to assess quality.</li> </ul>                                                                                                                                                                                                                                                                                                                                                                                                                                                                                                                 |

## DISCUSSION

This methods paper outlines the 7-step process for conducting systematic reviews of commercial health apps. Through comparison with systematic literature reviews, we explore the complexities of each stage of an app review and provide suggestions on how to formulate a research question, develop and run scoping searches, register the protocol, determine the eligibility criteria, conduct the final search and screening, extract data, perform quality assessments and synthesise the findings. We also propose that the novel TECH framework is adopted to allow a standardised specification to be developed and applied in health app reviews, similar to using PICO, SPICE, or SPIDER in traditional systematic reviews[29]. Additionally, we highlight the potential for PPIE activities within health app reviews.

Although health app reviews share core features with systematic reviews, three key differences warrant discussion. Firstly, commercial health apps, and reviews of these, are more transitory with rapid changes in the mHealth landscape that private industry providers dominate. For example, the geographical and price specificity of app sources are not replicable in the same way that evidence sources for systematic reviews are, and apps can appear, change and disappear quickly, impacting the replicability of the search results. Authors must be aware of the need to report granular details of their searches and to publish their review within a reasonable time from the search date, such as by using preprint servers while peer-review in a scientific journal takes place. Furthermore, the resources available to the review team are more critical than in systematic reviewing, so it is essential to transparently document scoping searches and iterative adjustments to review scope and inclusion criteria[59].

Secondly, the critical appraisal process for health app reviews requires a radically different approach to quality assessments for literature reviews, with multiple approaches and tools being used to explore app functionality and quality. This proliferation of assessment approaches means there is no ‘gold standard’ equivalent to the Cochrane Risk of Bias tool for RCTs in systematic reviews[49, 60]. There is also no equivalent to the wider consideration of evidence certainty which is provided by GRADE in systematic reviews[61]. Researchers must select an approach that best fits the review aims. Additionally, they may need to consider national standards within some countries, such as those from the UK National Institute for Health Research on digital health technologies evaluation[62], which may require specific approaches for the review context.

The third significant difference between systematic literature and health app reviews is the extent to which guidance, guidelines, and infrastructure support them. The methodological and reporting guidance for health app reviews is in its infancy. In contrast, an extensive body of literature outlining methods for different types of systematic and now scoping and rapid reviews exists[63-65]. There are also clear reporting guidelines for systematic reviews, which have been expanded to scoping reviews but are lacking for health app reviews[34, 66]. While we are undertaking research to develop methods and reporting guidance for app reviews, systematic review guidance should be referred to and adapted as necessary as an interim measure. Ultimately, there may also be a need for a tool which will allow critical appraisal of these types of mHealth reviews to parallel those that exist for systematic reviews such as AMSTAR-2[67] or ROBIS[68].

We propose that this outline will guide the conduct of good quality app reviews that can inform healthcare practitioners, patients, carers, health service managers, educators, and policymakers. We also

1 recommend the prospective registration of an app review protocol on OSF as a suitable alternative to  
2 PROSPERO where systematic review protocols are held[69], and the use of preprint servers to make app  
3 reviews openly available online, allowing for rapid dissemination of findings ahead of journal  
4 publication.

### 5 **Implications**

6  
7 This outline will help ensure that others can easily replicate the methods and that future app reviews are  
8 conducted in a standardised and rigorous manner. However, while outlining the methods, we noted gaps  
9 in conducting and reporting commercial health app reviews that need addressing. Hence, we are  
10 developing reporting guidelines for systematic health app reviews and plan to subsequently develop a  
11 quality appraisal tool. Similar to the 27-item PRISMA guideline for systematic reviews[34] and the 22-  
12 item PRISMA-Scr guideline for scoping reviews[66], our guideline will consist of a structured list of  
13 items that should be included when reporting commercial health app reviews.

14  
15 For those conducting commercial health app reviews, there is an opportunity for the inclusion of  
16 stakeholders to strengthen the quality and impact of their findings. This is particularly beneficial if the  
17 intended target audience experiences barriers when using health apps, as clear recommendations from an  
18 app review can help to improve the design and function of future versions of an app. Researchers should  
19 also be aware of the context in which the review is being conducted. Namely, companies owning the apps  
20 may use the review for business development and promotion opportunities or contest the quality scores.  
21 However, this highlights an opportunity for further stakeholder engagement: researchers could collaborate  
22 or consult with developers to ensure that the product aligns with the research assessment process of an  
23 app's quality. This has the potential to influence and promote accessibility and quality as aspects of  
24 development that might not be considered otherwise. Whilst industry developers focus on creating a  
25 commercially viable product, understanding this review process will potentially enhance and refine their  
26 development process to create a superior app than initially proposed. Ultimately, it is important to be  
27 aware of any conflicts of interest between researchers who are conducting reviews in systematic and  
28 robust ways, and industry who may wish to promote their work and financially benefit from the review  
29 findings. As with systematic reviews, collaborations which have the potential to generate such conflicts of  
30 interest should be fully and transparently reported in reviews, and review methods which minimise their  
31 potential impact should be implemented.

### 32 **Strengths and limitations**

33  
34  
35 This methodological discussion has numerous strengths, such as an experienced research team who have  
36 conducted various health app reviews and various types of traditional literature and systematic reviews.  
37 This was supplemented by identifying and including relevant app reviews from the top medical  
38 informatics journals and a robust analysis and comparison between traditional systematic reviews and  
39 commercial health app reviews. However, a systematic search of health app reviews was not undertaken  
40 (this will form part of our work in developing reporting guidance), nor did we focus on the emerging field  
41 of extended reality (i.e., virtual, augmented, and mixed reality) and their corresponding apps, many of  
42 which are health-related and available in other app stores (e.g., Steam and Oculus/Meta). Additionally,  
43 our app reviews focussed on apps for clients (e.g., patients or the public) and healthcare providers rather



1  
2  
3 1 than for the health system or data services, which are also target users of digital interventions[70]. It is  
4 2 likely that the recommendations in this discussion about evaluating commercially available mHealth apps  
5 3 will also apply to other health apps, including extended reality, and could support researchers working in  
6 4 these fields.  
7  
8 5

## 9 6 **CONCLUSION**

10 7

11 8 Reviews of commercial apps can provide insights into the availability of apps for a specific health topic,  
12 9 including their quality and functionality. We have proposed a 7-step method in an effort to standardise the  
13 10 process of conducting mHealth reviews. At each step, we have discussed the methods in contrast to  
14 11 systematic literature reviews, given that the process should similarly be systematic and robust. We have  
15 12 also introduced the novel TECH acronym, which will assist researchers with writing research questions  
16 13 for app reviews and determining the eligibility criteria. Through ongoing collaboration, we will continue  
17 14 to advocate for transparency and quality in app reviews by working on reporting guidelines and a quality  
18 15 appraisal tool.  
19 16

20 17 **FUNDING:** NG, DD, GN, CE-T and SMA are funded by the National Institute for Health and Care  
21 18 Research Applied Research Collaboration Greater Manchester (NIHR ARC GM). LM is supported by a  
22 19 National Institute for Health and Care Research Senior Investigator Award to Professor Chris Todd  
23 20 (Reference NIHR200299). The views expressed in this publication are those of the authors and not  
24 21 necessarily those of the National Institute for Health and Care Research or the Department of Health and  
25 22 Social Care. Grant numbers: N/A.  
26 23

27 24 **CONFLICTS OF INTEREST:** None.  
28 25

29 26 **ETHICS:** Ethics approval was not required.  
30 27

31 28 **AUTHOR CONTRIBUTIONS:** NG and DD conceptualised the paper. NG, DD, GN, LM, CE-T, DJ,  
32 29 AV, SMA and SO made intellectual contributions and contributed to writing the paper. NG, DD, GN,  
33 30 LM, CE-T, DJ, AV, SMA and SO approved the final manuscript.  
34 31

35 32 **PATIENT CONSENT FOR PUBLICATION:** Not required.  
36 33

## 37 34 **REFERENCES**

- 38 35 1. Mayer, M.A., O. Rodríguez Blanco, and A. Torrejon, Use of Health Apps by Nurses for  
39 36 Professional Purposes: Web-Based Survey Study. *JMIR Mhealth Uhealth*, 2019. 7(11): p.  
40 37 e15195.
- 41 38 2. Bates, D.W., A. Landman, and D.M. Levine, Health Apps and Health Policy: What Is Needed?  
42 39 *Jama*, 2018. 320(19): p. 1975-1976.
- 43 40 3. Dsouza, S.M., et al., Effectiveness of self-management applications in improving clinical health  
44 41 outcomes and adherence among diabetic individuals in low and middle-income countries: a  
45 42 systematic review. *BMJ Open*, 2022. 12(11): p. e060108.
- 46 43 4. Doumen, M., et al., Engagement and attrition with eHealth tools for remote monitoring in chronic  
47 44 arthritis: a systematic review and meta-analysis. *RMD Open*, 2022. 8(2).



- 1 5. De Santis, K.K., et al., Evaluation of Digital Interventions for Physical Activity Promotion: Scoping Review. *JMIR Public Health Surveill*, 2022. 8(5): p. e37820.
- 2 6. Chew, H.S.J., et al., Sustainability of Weight Loss Through Smartphone Apps: Systematic Review and Meta-analysis on Anthropometric, Metabolic, and Dietary Outcomes. *J Med Internet Res*, 2022. 24(9): p. e40141.
- 3 7. Dasgupta, N., A. Lazard, and J.S. Brownstein, Covid-19 vaccine apps should deliver more to patients. *Lancet Digit Health*, 2021. 3(5): p. e278-e279.
- 4 8. Lee, M., et al., Mobile App-Based Health Promotion Programs: A Systematic Review of the Literature. *Int J Environ Res Public Health*, 2018. 15(12).
- 5 9. World Health Organisation. Applications. 2022 [cited 2023 10/01/2023]; Available from: <https://www.who.int/news-room/apps>.
- 6 10. Larsen, M.E., et al., Using science to sell apps: Evaluation of mental health app store quality claims. *NPJ Digit Med*, 2019. 2: p. 18.
- 7 11. Moshi, M.R., R. Tooher, and T. Merlin, SUITABILITY OF CURRENT EVALUATION FRAMEWORKS FOR USE IN THE HEALTH TECHNOLOGY ASSESSMENT OF MOBILE MEDICAL APPLICATIONS: A SYSTEMATIC REVIEW. *Int J Technol Assess Health Care*, 2018. 34(5): p. 464-475.
- 8 12. Henson, P., et al., Deriving a practical framework for the evaluation of health apps. *Lancet Digit Health*, 2019. 1(2): p. e52-e54.
- 9 13. Lagan, S., et al., Actionable health app evaluation: translating expert frameworks into objective metrics. *NPJ Digit Med*, 2020. 3: p. 100.
- 10 14. Nouri, R., et al., Criteria for assessing the quality of mHealth apps: a systematic review. *J Am Med Inform Assoc*, 2018. 25(8): p. 1089-1098.
- 11 15. Manta, C., et al., EVIDENCE Publication Checklist for Studies Evaluating Connected Sensor Technologies: Explanation and Elaboration. *Digit Biomark*, 2021. 5(2): p. 127-147.
- 12 16. Agarwal, S., et al., Guidelines for reporting of health interventions using mobile phones: mobile health (mHealth) evidence reporting and assessment (mERA) checklist. *Bmj*, 2016. 352: p. i1174.
- 13 17. Eysenbach, G., CONSORT-EHEALTH: improving and standardizing evaluation reports of Web-based and mobile health interventions. *J Med Internet Res*, 2011. 13(4): p. e126.
- 14 18. Weisel, K.K., et al., Standalone smartphone apps for mental health-a systematic review and meta-analysis. *NPJ Digit Med*, 2019. 2: p. 118.
- 15 19. Gasteiger, N., et al., Sticky apps, not sticky hands: A systematic review and content synthesis of hand hygiene mobile apps. *J Am Med Inform Assoc*, 2021. 28(9): p. 2027-2038.
- 16 20. Gasteiger, N., et al., Patient-facing genetic and genomic mobile apps in the UK: a systematic review of content, functionality, and quality. *J Community Genet*, 2022. 13(2): p. 171-182.
- 17 21. Khan, K.S., et al., Five steps to conducting a systematic review. *J R Soc Med*, 2003. 96(3): p. 118-21.
- 18 22. Xiao, Y. and M. Watson, Guidance on Conducting a Systematic Literature Review. *Journal of Planning Education and Research*, 2019. 39(1): p. 93-112.
- 19 23. Paripoorani, D., et al., A systematic review of menopause apps with an emphasis on osteoporosis in progress.
- 20 24. Vercell, A., et al., Patient-facing cancer mobile apps that enable patient reported outcome data to be collected: A systematic review of content, functionality, quality, and ability to integrate with electronic health records. *Int J Med Inform*, 2022. 170: p. 104931.
- 21 25. Ali, S.M., et al., Digital manikins to self-report pain on a smartphone: A systematic review of mobile apps. *Eur J Pain*, 2021. 25(2): p. 327-338.
- 22 26. Pearsons, A., et al., Atrial fibrillation self-management: a mobile telephone app scoping review and content analysis. *Eur J Cardiovasc Nurs*, 2021. 20(4): p. 305-314.
- 23 27. McGarrigle, L., E. Boulton, and C. Todd, Map the apps: a rapid review of digital approaches to support the engagement of older adults in strength and balance exercises. *BMC Geriatr*, 2020. 20(1): p. 483.

- 1 28. Booth, A., et al., The nuts and bolts of PROSPERO: an international prospective register of  
2 systematic reviews. *Systematic Reviews*, 2012. 1(1): p. 2.
- 3 29. Cooke, A., D. Smith, and A. Booth, Beyond PICO: the SPIDER tool for qualitative evidence  
4 synthesis. *Qual Health Res*, 2012. 22(10): p. 1435-43.
- 5 30. Parmar, P., et al., Health-focused conversational agents in person-centered care: a review of apps.  
6 *NPJ Digit Med*, 2022. 5(1): p. 21.
- 7 31. Carlo, A.D., et al., By the numbers: ratings and utilization of behavioral health mobile  
8 applications. *npj Digital Medicine*, 2019. 2(1): p. 54.
- 9 32. Veritas Health Innovation. Covidence systematic review software. 2023; Available from:  
10 [www.covidence.org](http://www.covidence.org).
- 11 33. Ouzzani, M., et al., Rayyan—a web and mobile app for systematic reviews. *Systematic Reviews*,  
12 2016. 5(1): p. 210.
- 13 34. Page, M.J., et al., The PRISMA 2020 statement: an updated guideline for reporting systematic  
14 reviews. *BMJ*, 2021. 372: p. n71.
- 15 35. Rajani, N.B., et al., Use of gamification strategies and tactics in mobile applications for smoking  
16 cessation: a review of the UK mobile app market. *BMJ Open*, 2019. 9(6): p. e027883.
- 17 36. Internet Society. Best Practices: Privacy. 2019; Available from:  
18 <https://www.internetsociety.org/resources/ota/2019/best-practices-privacy/>.
- 19 37. Michie, S., et al., The behavior change technique taxonomy (v1) of 93 hierarchically clustered  
20 techniques: building an international consensus for the reporting of behavior change  
21 interventions. *Ann Behav Med*, 2013. 46(1): p. 81-95.
- 22 38. Laloo, C., et al., Commercially Available Smartphone Apps to Support Postoperative Pain Self-  
23 Management: Scoping Review. *JMIR Mhealth Uhealth*, 2017. 5(10): p. e162.
- 24 39. Grainger, R., et al., Apps for People With Rheumatoid Arthritis to Monitor Their Disease  
25 Activity: A Review of Apps for Best Practice and Quality. *JMIR Mhealth Uhealth*, 2017. 5(2): p.  
26 e7.
- 27 40. Flesch, R., *How to Write Plain English: A Book for Lawyers and Consumers*. 1979, New York:  
28 Harper & Row.
- 29 41. Kincaid, J., et al., Derivation Of New Readability Formulas (Automated Readability Index, Fog  
30 Count And Flesch Reading Ease Formula) For Navy Enlisted Personnel. Research Branch Report  
31 8-75. 1975, Naval Technical Training, U. S. Naval Air Station: Millington, TN.
- 32 42. Stoyanov, S.R., et al., Development and Validation of the User Version of the Mobile Application  
33 Rating Scale (uMARS). *JMIR Mhealth Uhealth*, 2016. 4(2): p. e72.
- 34 43. Domnich, A., et al., Development and validation of the Italian version of the Mobile Application  
35 Rating Scale and its generalisability to apps targeting primary prevention. *BMC Med Inform  
36 Decis Mak*, 2016. 16: p. 83.
- 37 44. Martin Payo, R., et al., Spanish adaptation and validation of the Mobile Application Rating Scale  
38 questionnaire. *Int J Med Inform*, 2019. 129: p. 95-99.
- 39 45. Messner, E.M., et al., The German Version of the Mobile App Rating Scale (MARS-G):  
40 Development and Validation Study. *JMIR Mhealth Uhealth*, 2020. 8(3): p. e14479.
- 41 46. Saliasi, I., et al., Promoting Health via mHealth Applications Using a French Version of the  
42 Mobile App Rating Scale: Adaptation and Validation Study. *JMIR Mhealth Uhealth*, 2021. 9(8):  
43 p. e30480.
- 44 47. Terhorst, Y., et al., Validation of the Mobile Application Rating Scale (MARS). *PLoS One*, 2020.  
45 15(11): p. e0241480.
- 46 48. Stoyanov, S. MARS training video. 2016; Available from:  
47 <https://www.youtube.com/watch?v=25vBwJQIOcE>.
- 48 49. Higgins, J.P., et al., The Cochrane Collaboration's tool for assessing risk of bias in randomised  
49 trials. *Bmj*, 2011. 343: p. d5928.

- 1 50. Aitken, M. and C. Gauntlett. IMS Institute for Healthcare Informatics: Patient Apps for Improved  
2 Healthcare: From Novelty to Mainstream. 2013; Available from: [http://ignacioriesgo.es/wp-](http://ignacioriesgo.es/wp-content/uploads/2014/03/iihi_patient_apps_report_editora_39_2_1.pdf)  
3 [content/uploads/2014/03/iihi\\_patient\\_apps\\_report\\_editora\\_39\\_2\\_1.pdf](http://ignacioriesgo.es/wp-content/uploads/2014/03/iihi_patient_apps_report_editora_39_2_1.pdf).
- 4 51. Plante, T.B., et al., Trends in user ratings and reviews of a popular yet inaccurate blood pressure-  
5 measuring smartphone app. *J Am Med Inform Assoc*, 2018. 25(8): p. 1074-1079.
- 6 52. Levine, D.M., et al., Design and testing of a mobile health application rating tool. *NPJ Digit Med*,  
7 2020. 3: p. 74.
- 8 53. Tangari, G., et al., Analyzing security issues of android mobile health and medical applications. *J*  
9 *Am Med Inform Assoc*, 2021. 28(10): p. 2074-2084.
- 10 54. Chidambaram, S., et al., Observational study of UK mobile health apps for COVID-19. *Lancet*  
11 *Digit Health*, 2020. 2(8): p. e388-e390.
- 12 55. McHugh, M.L., Interrater reliability: the kappa statistic. *Biochem Med (Zagreb)*, 2012. 22(3): p.  
13 276-82.
- 14 56. Hallgren, K.A., Computing Inter-Rater Reliability for Observational Data: An Overview and  
15 Tutorial. *Tutor Quant Methods Psychol*, 2012. 8(1): p. 23-34.
- 16 57. Shrout, P.E. and J.L. Fleiss, Intraclass correlations: uses in assessing rater reliability. *Psychol*  
17 *Bull*, 1979. 86(2): p. 420-8.
- 18 58. Serrano-Aguilar, P., et al., Patient involvement in health research: a contribution to a systematic  
19 review on the effectiveness of treatments for degenerative ataxias. *Soc Sci Med*, 2009. 69(6): p.  
20 920-5.
- 21 59. Nussbaumer-Streit, B., et al., Resource use during systematic review production varies widely: a  
22 scoping review. *Journal of Clinical Epidemiology*, 2021. 139: p. 287-296.
- 23 60. Sterne, J.A.C., et al., RoB 2: a revised tool for assessing risk of bias in randomised trials. *BMJ*,  
24 2019. 366: p. 14898.
- 25 61. Guyatt, G., et al., GRADE guidelines: 1. Introduction&#x2014;GRADE evidence profiles and  
26 summary of findings tables. *Journal of Clinical Epidemiology*, 2011. 64(4): p. 383-394.
- 27 62. National Institute for Health and Care Excellence. Evidence standards framework (ESF) for  
28 digital health technologies. 2022; Available from: [https://www.nice.org.uk/about/what-we-](https://www.nice.org.uk/about/what-we-do/our-programmes/evidence-standards-framework-for-digital-health-technologies#how-use)  
29 [do/our-programmes/evidence-standards-framework-for-digital-health-technologies#how-use](https://www.nice.org.uk/about/what-we-do/our-programmes/evidence-standards-framework-for-digital-health-technologies#how-use).
- 30 63. Higgins, J., et al., *Cochrane Handbook for Systematic Reviews of Interventions* version 6.3.  
31 2022, Cochrane: [www.training.cochrane.org/handbook](http://www.training.cochrane.org/handbook).
- 32 64. Garritty, C., et al., Cochrane Rapid Reviews Methods Group offers evidence-informed guidance  
33 to conduct rapid reviews. *Journal of Clinical Epidemiology*, 2021. 130: p. 13-22.
- 34 65. Peters, M.D.J., et al., Updated methodological guidance for the conduct of scoping reviews. *JB*  
35 *Evid Synth*, 2020. 18(10): p. 2119-2126.
- 36 66. Tricco, A., et al., PRISMA extension for scoping reviews (PRISMA-ScR): checklist and  
37 explanation. *Ann Intern Med*, 2018. 169(7): p. 467-473.
- 38 67. Shea, B.J., et al., AMSTAR 2: a critical appraisal tool for systematic reviews that include  
39 randomised or non-randomised studies of healthcare interventions, or both. *BMJ*, 2017. 358: p.  
40 j4008.
- 41 68. Whiting, P., et al., ROBIS: A new tool to assess risk of bias in systematic reviews was developed.  
42 *Journal of clinical epidemiology*, 2016. 69: p. 225-234.
- 43 69. Booth, A., et al., PROSPERO at one year: an evaluation of its utility. *Systematic Reviews*, 2013.  
44 2(1): p. 4.
- 45 70. World Health Organization, *Classification of digital health interventions*. 2018: Geneva.

1  
2  
3 **FIGURE LEGENDS**

4  
5 2  
6 3 **Figure 1.** TECH framework with a worked example.

7 4  
8 5 **Figure 2.** Simulated radar graph mapping the 11 IMS criteria.  
9 6  
10  
11  
12  
13  
14  
15  
16  
17  
18  
19  
20  
21  
22  
23  
24  
25  
26  
27  
28  
29  
30  
31  
32  
33  
34  
35  
36  
37  
38  
39  
40  
41  
42  
43  
44  
45  
46  
47  
48  
49  
50  
51  
52  
53  
54  
55  
56  
57  
58  
59  
60

For peer review only

| Acronym                                        | Questions and similarity to other acronyms (if applicable)                                                                        | Example for writing the research question (or aim)                                                                                                  | Example of the inclusion criteria                                                                                                                                                                                                                   |
|------------------------------------------------|-----------------------------------------------------------------------------------------------------------------------------------|-----------------------------------------------------------------------------------------------------------------------------------------------------|-----------------------------------------------------------------------------------------------------------------------------------------------------------------------------------------------------------------------------------------------------|
| <p><b>T</b></p> <p><b>Target user</b></p>      | <p><b>Who is the app aimed at?</b><br/>This is similar to Sample in SPIDER and Patient/population in PICO.</p>                    | <p>Adults</p>                                                                                                                                       | <ul style="list-style-type: none"> <li>Adults (aged 18 years and above) with a diagnosis of atrial fibrillation</li> <li>English speakers (apps had to be in English)</li> <li>Users who may pay for apps (paid and free apps)</li> </ul>           |
| <p><b>E</b></p> <p><b>Evaluation focus</b></p> | <p><b>What is the focus of the evaluation?</b><br/>This is similar to the Evaluation in SPIDER and Outcomes in PICO.</p>          | <p>Self-management capabilities</p> <p>App characteristics, functions, privacy/security, behaviour change techniques and quality and usability.</p> | <ul style="list-style-type: none"> <li>Mention self-management capabilities<br/><i>e.g., behaviour change, consultations, education, medication management, peer support, symptom control, tracking physical mental or social health</i></li> </ul> |
| <p><b>C</b></p> <p><b>Connectedness</b></p>    | <p><b>Do the apps connect with existing services, devices or applications?</b></p>                                                | <p>Standalone apps</p>                                                                                                                              | <ul style="list-style-type: none"> <li>Standalone apps, not connected to wearables, other devices, software applications or human-driven services</li> </ul>                                                                                        |
| <p><b>H</b></p> <p><b>Health domain</b></p>    | <p><b>What health domain or field is being explored?</b><br/>This is similar to the Phenomenon of Interest (topic) in SPIDER.</p> | <p>Atrial fibrillation</p>                                                                                                                          | <ul style="list-style-type: none"> <li>Atrial fibrillation directly included in the keywords or images accompanying the app description</li> </ul>                                                                                                  |

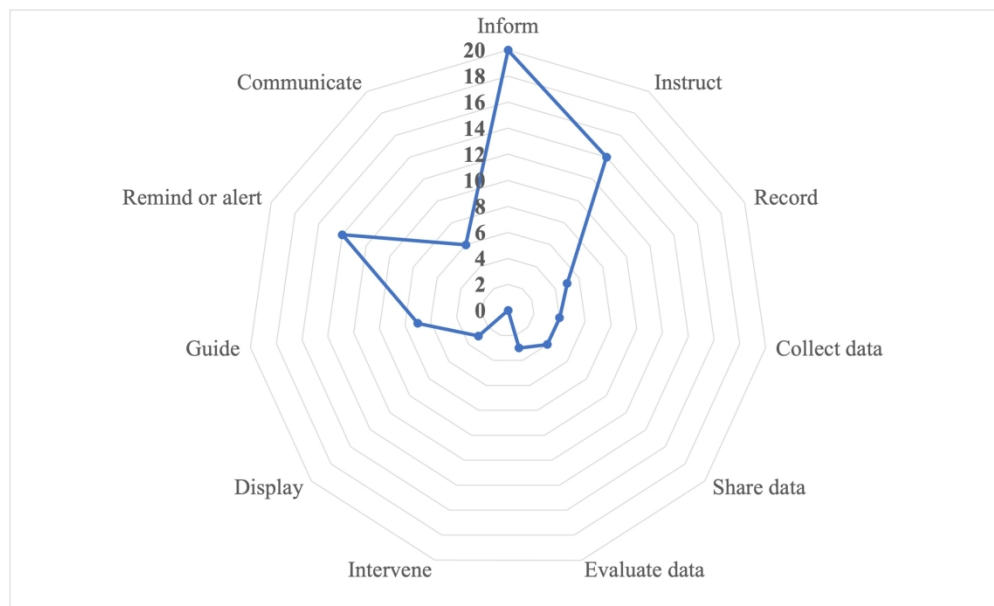

Figure 2. Simulated radar graph mapping the 11 IMS criteria.

222x134mm (330 x 330 DPI)
